1 **ORP5/8 AND MIB/MICOS LINK ER-MITOCHONDRIA AND**  
2 **INTRAMITOCHONDRIAL CONTACTS FOR NON-VESICULAR TRANSPORT OF**  
3 **PHOSPHATIDYLSERINE**

4  
5 **Leila Rochin<sup>1,2\*</sup>, Vera F. Monteiro-Cardoso<sup>1,2\*</sup>, Amita Arora<sup>3</sup>, Audrey Houcine<sup>4</sup>,**  
6 **Eeva Jääskeläinen<sup>5</sup>, Annukka M. Kivelä<sup>3</sup>, Cécile Sauvanet<sup>1,2</sup>, Romain Le Bars<sup>1,6</sup>,**  
7 **Eyra Marien<sup>5</sup>, Jonas Dehairs<sup>5</sup>, Julie Neveu<sup>1,2</sup>, Naima El Khallouki<sup>1,2</sup>, Elena**  
8 **Santonico<sup>7</sup>, Johannes V. Swinnen<sup>5</sup>, David Taresté<sup>8</sup>, Vesa M. Olkkonen<sup>3,9</sup>, and**  
9 **Francesca Giordano<sup>1,2#</sup>**

10

11 <sup>1</sup> Institute for Integrative Biology of the Cell (I2BC), CEA, CNRS, Univ. Paris-Sud,  
12 Université Paris-Saclay, Gif-sur-Yvette cedex 91198, France.

13 <sup>2</sup> Inserm U1280, Gif-sur-Yvette cedex 91198, France.

14 <sup>3</sup> Minerva Foundation Institute for Medical Research, Biomedicum 2U, FI-00290  
15 Helsinki, Finland

16 <sup>4</sup> Institut Jacques Monod, CNRS, UMR7592, Université Paris Diderot, Sorbonne Paris  
17 Cité, F-75013 Paris, France

18 <sup>5</sup> Laboratory of Lipid Metabolism and Cancer, Department of Oncology, KU Leuven,  
19 Leuven B-3000, Belgium.

20 <sup>6</sup> Imagerie-Gif, Light Microscopy Facility, Institute for Integrative Biology of the Cell  
21 (I2BC), CEA, CNRS, Univ. Paris-Sud, Université Paris-Saclay, Gif-sur-Yvette cedex  
22 91198, France

23 <sup>7</sup> University of Rome Tor Vergata, via della ricerca scientifica, dipartimento di Biologia,  
24 00133, Italy

25 <sup>8</sup> Institute of Psychiatry and Neuroscience of Paris (IPNP), Inserm UMR-S 1266,  
26 Université de Paris, Paris, France

27 <sup>9</sup> Department of Anatomy, Faculty of Medicine, FI-00014 University of Helsinki, Finland

28

29 \* These authors contributed equally to this work

30 #Correspondence to: francesca.giordano@i2bc.paris-saclay.fr

31

## 32 **SUMMARY**

33 Mitochondria are dynamic organelles essential for cell survival whose structural and  
34 functional integrity rely on selective and regulated transport of lipids from/to the  
35 endoplasmic reticulum (ER) and across the mitochondrial intermembrane space. As they  
36 are not connected by vesicular transport, the exchange of lipids between ER and  
37 mitochondria occurs at sites of close organelle apposition called membrane contact sites.  
38 However, the mechanisms and proteins involved in these processes are only beginning  
39 to emerge. Here, we show that the main physiological localization of the lipid transfer  
40 proteins ORP5 and ORP8 is at mitochondria-associated ER membranes (MAMs)  
41 subdomains, physically linked to the MIB/MICOS complexes that bridge the two  
42 mitochondrial membranes. We also show that ORP5/8 mediate non-vesicular transport of  
43 phosphatidylserine (PS) lipids from the ER to mitochondria by cooperating with the  
44 MIB/MICOS complexes. Overall our study reveals a novel physical and functional link  
45 between ER-mitochondria contacts involved in lipid transfer and intra-mitochondrial  
46 membranes contacts maintained by the MIB/MICOS complexes.

47

## 48 **KEYWORDS**

49 Membrane contact sites, MAM, ER, mitochondria, ORP, phosphatidylserine.

## 50 INTRODUCTION

51 Vesicular trafficking is the major pathway for transport of proteins and lipids between  
52 membranes. However, an alternative route, which is vesicle-independent, occurs at  
53 regions of close inter-organelle membrane proximity (within less than 30 nm) also called  
54 membrane contact sites (Scorrano, De Matteis et al., 2019). This route is particularly  
55 important to preserve membrane composition, integrity and identity of intracellular  
56 organelles such as mitochondria that are largely excluded from the classical vesicle-  
57 mediated trafficking pathway. Like other organelles, mitochondria can be closely  
58 associated with the endoplasmic reticulum (ER), the major site of lipid synthesis and the  
59 major intracellular calcium ( $\text{Ca}^{2+}$ ) store. ER membrane subdomains closely apposed to  
60 mitochondria are called mitochondria-associated ER membranes (MAMs) and they  
61 facilitate the exchange of  $\text{Ca}^{2+}$  and lipids between the two organelles (Herrera-Cruz &  
62 Simmen, 2017, Tatsuta, Scharwey et al., 2014, Vance, 2014).

63 Mitochondria are involved in a plethora of cellular processes including energy  
64 production, lipid metabolism,  $\text{Ca}^{2+}$  homeostasis and apoptosis. To fulfill their numerous  
65 functions, mitochondria need to maintain a defined membrane composition by receiving  
66 essential lipids and lipid precursors from the ER through membrane contact sites  
67 (Giordano, 2018, Vance & Tasseva, 2013).

68 Increasing lines of evidence suggest that lipid transfer proteins (LTPs) play a major  
69 role in regulating the lipid composition of membranous organelles by facilitating non-  
70 vesicular lipid transport at membrane contact sites. In recent years, several tethering  
71 complexes with lipid transfer activity have been identified at membrane contact sites  
72 between the ER and other intracellular organelles as well as the plasma membrane (PM)  
73 in yeast and mammalian cells. However, our knowledge of how lipids are exchanged at  
74 ER-mitochondria membrane contact sites remains rudimentary, and the LTPs that localize

75 and function at these sites are just starting to be discovered. The best-studied lipid  
76 transfer/tethering complex at ER-mitochondria contact sites is the yeast ER-mitochondria  
77 encounter structure (ERMES) (Kornmann et al 2009, Lang et al 2015) that bridges the  
78 ER and the mitochondrial membranes and also facilitates the exchange of  
79 phospholipids (in particular phosphatidylcholine, PC) between them. In metazoans,  
80 very little is known on how lipids are exchanged at ER-mitochondria membrane contact  
81 sites and about the proteins involved in this process. Some tethers at mammalian ER-  
82 mitochondria contact sites have emerged in the recent years (Gatta and Levine 2017).  
83 However, none of these proteins has been directly involved in non-vesicular lipid  
84 transport between ER and mitochondrial membranes. Recently, mammalian LTPs with  
85 tethering function, such as VPS13A or Pdzd8 (the latter being proposed as a paralog  
86 of the ERMES subunit Mmm1(Wideman, Balacco et al., 2018)), were shown to localize  
87 at membrane contact sites, including those between ER and mitochondria, where they  
88 regulate membrane tethering and, in the case of Pdzd8, mitochondrial  $Ca^{2+}$  uptake  
89 (Hirabayashi, Kwon et al., 2017, Kumar, Leonzino et al., 2018). However, their function  
90 in lipid transport at these ER-mitochondria contacts has not been proven.

91 The Oxysterol binding protein (OSBP)-related proteins constitute a large family of  
92 LTPs conserved from yeast (Osh) to humans (ORP) and localized to different  
93 subcellular sites, shown in several cases to be membrane contact sites. A common  
94 feature of all ORPs is the presence of an OSBP-related lipid-binding/transfer (ORD)  
95 domain. Most ORP proteins contain a two phenylalanines (FF) in an acidic tract  
96 (FFAT)-motif that binds ER-localized VAP proteins and a pleckstrin homology (PH)  
97 domain that interacts with lipids or proteins in distinct non-ER organelle membranes.  
98 Two members of this family, ORP5 and ORP8, do not contain an FFAT motif but are  
99 directly anchored to the ER through a C-terminal transmembrane (TM) segment.

100       ORP5 and ORP8 have been previously shown to localize at ER-PM contact sites  
101 where they transfer phosphatidylserine (PS) from the cortical ER to the PM, in counter-  
102 exchange with the phosphoinositides Phosphatidylinositol-4-phosphate (PI4P) and  
103 Phosphatidylinositol 4,5-bisphosphate (PIP<sub>2</sub>) (Chung et al. 2015; Ghai et al, 2017). We  
104 have recently shown that ORP5 and ORP8 are also present in the MAM and play a  
105 key role in maintaining mitochondrial integrity (Galmes, Houcine et al., 2016). We and  
106 others, have also shown that ORP5/8 form a protein complex in the cell (Chung, Torta  
107 et al., 2015, Galmes et al., 2016). However, ORP5 and ORP8, when overexpressed,  
108 display a different distribution within MCS. In particular, overexpression of ORP5  
109 greatly expands ER-PM contacts (Chung et al., 2015, Galmes et al., 2016), resulting  
110 in an accumulation of ORP5 at these sites, while overexpressed ORP8 is largely  
111 retained in the reticular ER. As all the studies on ORP5 and ORP8 so far have  
112 employed their individual overexpression, the endogenous sites where ORP5 and  
113 ORP8 interact and function as a complex are still unknown.

114       Interestingly, transport of PS is a key event occurring at ER-mitochondria contact  
115 sites. Newly synthesized PS, by the ER-localized PS-Synthase 1 (PSS1), is shuttled from  
116 the ER to the outer mitochondrial membrane (OMM) and from OMM to inner mitochondrial  
117 membrane (IMM) where it is rapidly converted to phosphatidylethanolamine (PE) by the  
118 PS-decarboxylase enzyme PISD (Vance, 1990, Vance & Tasseva, 2013). At the IMM, PE  
119 plays crucial roles in maintaining mitochondrial tubular morphology and therefore  
120 mitochondrial respiratory functions (Joshi, Thompson et al., 2012, Steenbergen,  
121 Nanowski et al., 2005). Regardless of extensive studies on PS transport between ER and  
122 mitochondria since its first discovery more than 20 years ago (Vance, 1990), the  
123 underlying mechanisms and proteins involved are still elusive.

124 Membrane contact sites exist also between the OMM and the IMM and are mediated  
125 by the Mitochondrial Intermembrane space Bridging (MIB) and Mitochondrial Contact  
126 sites and Cristae junction Organizing System (MICOS) complexes. The MICOS complex  
127 is a multi-subunit complex preferentially located at Cristae Junctions (CJ), tubular  
128 structures that connect the IMM to the cristae, and it is necessary for CJ formation, cristae  
129 morphology and mitochondria function (Harner, Korner et al., 2011, Huynen,  
130 Muhlmeister et al., 2016, Ott, Dorsch et al., 2015, Wollweber, von der Malsburg et al.,  
131 2017). The integral IMM protein Mitofilin is the central component of the MICOS  
132 complex and carries a large domain exposed to the mitochondria intermembrane  
133 space (IMS) that interacts with the OMM Sorting and Assembly Machinery (SAM) to  
134 form the MIB complex (Friedman, Mourier et al., 2015, Guarani, McNeill et al., 2015).  
135 The SAM complex is constituted of SAM50 (a pore-forming  $\beta$ -barrel protein), Metaxin1  
136 and 2, and is involved in the membrane insertion and assembly of mitochondrial  $\beta$ -  
137 barrel proteins (Hohr, Lindau et al., 2018, Kozjak, Wiedemann et al., 2003, Kozjak-  
138 Pavlovic, Ross et al., 2007). However, whether and how OMM-IMM contact sites are  
139 linked to ER-mitochondria contacts in mammalian cells is still largely unknown.

140 Here we uncover for the first time the endogenous localization of ORP5 and ORP8,  
141 revealing that the major site of their interaction in physiological conditions are the  
142 MAMs. We also show that the ER subdomains where ORP5 and ORP8 reside are  
143 physically connected to the intra-mitochondrial membrane contacts bridged by the  
144 MIB/MICOS complexes at cristae junctions. We then show that ORP5/8 cooperate with  
145 SAM50 and Mitofilin, key components of the MIB/MICOS complex, to mediate PS  
146 transport from the ER to the mitochondrial membranes at ER-mitochondria contact  
147 sites in mammalian cells, and consequently the synthesis of mitochondrial PE.

148 Our findings reveal a novel tripartite association between the ER and the two  
149 mitochondrial membranes that links lipid transfer across these membranes, cristae  
150 biogenesis and consequently mitochondria function.

151

## 152 **RESULTS**

### 153 **ER-mitochondria contact sites are the main physiological localization of the** 154 **ORP5-ORP8 complex**

155 The localization of ORP5 and ORP8 at membrane contact sites at endogenous  
156 level is still unknown. We thus investigated the localization of endogenous ORP5 and  
157 ORP8 by immunofluorescence using antibodies against ORP5 and ORP8 proteins. First,  
158 we validated the specificity of these antibodies in cells overexpressing ORP5 or ORP8  
159 proteins fused with a similar fluorescent tag (EGFP-ORP5 or EGFP-ORP8) and found that  
160 ORP5 and ORP8 signals detected using these antibodies co-localized with the  
161 overexpressed proteins (Fig. S1a-b). Then, we analyzed ORP5 and ORP8 endogenous  
162 localization in control HeLa cells and in cells where ORP5 and ORP8 were downregulated  
163 by RNAi and whose mitochondria were labeled by MitoTracker. We found a strong  
164 decrease in ORP5 and ORP8 labeling upon their knockdown, whose efficiency (of about  
165 95-100%) was confirmed by WB (Fig. 1b), confirming the specificity of the used antibodies  
166 (Fig. 1a-c, S1a-b). Interestingly, in control conditions the majority of endogenous ORP5  
167 and ORP8 co-localized to subcellular compartments in close proximity to mitochondria  
168 (Fig. 1a, 1d, 1e-f, S1c). ORP5 and ORP8-positive compartments overlapped with the ER  
169 protein RFP-Sec22b, confirming endogenous ORP5 and ORP8 localization to the ER and  
170 further validating the specificity of these antibodies (Fig. S1c).

171 We then sought to analyze ORP5 and ORP8 localization when co-overexpressed (at  
172 similar levels) by co-transfecting HA-ORP5 and EGFP-ORP8 in HeLa cells and comparing

173 their localization with the individually expressed ORP5 and ORP8 (EGFP-ORP5 or EGFP-  
174 ORP8) by confocal microscopy. When expressed alone, EGFP- ORP5 localizes to ER in  
175 contact with mitochondria, but also strongly increases ER-PM contact sites where it  
176 redistributes, while it localizes very little in the reticular ER (Fig. 1g, S1d and (Galmes et  
177 al., 2016)). Instead, EGFP-ORP8, when expressed alone, localizes mostly to ER-  
178 mitochondria contact sites and to reticular ER, with only a minor pool at cortical ER, as it  
179 does not increase ER-PM contact sites (Fig. 1g, S1d). Remarkably, even if the individually  
180 overexpressed ORP5 and ORP8 were differently distributed among MCS, their  
181 localization at ER-mitochondria contacts was higher as compared to a general ER protein,  
182 such as Sec22b (Fig. 1h). Moreover, and interestingly, when expressed together, ORP5  
183 and ORP8 equally redistributed and co-localized to cortical ER, reticular ER and ER-  
184 mitochondria contacts (Fig. 1g, S1d). In particular, their localization to ER-mitochondria  
185 contacts was higher as compared to when expressed individually (Fig. 1h). Also, the co-  
186 localization of co-overexpressed ORP5 and ORP8 was comparable to the co-localization  
187 of the endogenous proteins, as revealed by the high Pearson's correlation coefficient that  
188 was in both cases close to 1 (Fig. 1f). These data indicate that co-expression of ORP5  
189 and ORP8 mimics the physiological localization of these proteins as a complex, when the  
190 expression levels of one of the two proteins are not highly enriched as compared to the  
191 other.

192 To further analyze and quantify ORP5 and ORP8 co-localization and interaction at  
193 ER-mitochondria contact sites in co-overexpression and endogenous conditions we used  
194 Duolink-Proximity Ligation Assay (PLA) coupled with staining of mitochondria  
195 (MitoTracker) and confocal microscopy. PLA signals corresponding to ORP5-ORP8  
196 interaction were observed throughout the cell in both endogenous and co-overexpression  
197 (HA-ORP5 and 3XFLAG-ORP8) conditions (Fig. 2a). The specificity of this assay and of



198 the antibodies used was confirmed by the strong decrease in PLA signals for endogenous  
199 ORP5-ORP8 interaction in cells with ORP5 and ORP8 knocked down (Fig. 2b, S2a).  
200 Likewise, a significant increase in ORP5-8 PLA signals was induced by the  
201 overexpression of these proteins (Fig. 2b)

202 Close association of PLA spots to mitochondria, indicating localization at ER-  
203 mitochondria contact sites, was measured after segmentation of the mitochondrial  
204 network by Imaris (Fig. 2a, right panel; S2b). Interestingly, the majority of ORP5-8 PLA  
205 signals localized at ER-mitochondria contact sites (52% of endogenous ORP5-8 and 50%  
206 of co-overexpressed ORP5-8) (Fig. 2a, 2c). The localization of ORP5-8 PLA signals to  
207 ER-PM contact sites was analyzed in HeLa cells transfected with RFP-PH-PLC $\delta$ , to stain  
208 the PM, and Mito-BFP, to label mitochondria. However, only a minor pool of ORP5-8 PLA  
209 spots was found in contact with the PM (4% of endogenous ORP5-8 and 5% of co-  
210 overexpressed ORP5-8) (Fig. 2d-f). The localization of ORP5-ORP8 PLA spots to the ER,  
211 including MAMs, was confirmed in cells co-expressing the ER protein Sec22b and the  
212 mitochondrial-targeted Mito-BFP (Fig. S2c).

213 Overall these data reveal for the first time that the main sites where ORP5 and ORP8  
214 localize and interact in physiological and endogenous conditions are the ER-mitochondria  
215 contact sites, and not the ER-PM contacts.

216

### 217 **ORP5/8 physically interact with the mitochondrial intermembrane space** 218 **bridging (MIB) complex facing cristae junctions**

219 To investigate whether ORP5/8 localize to specific ER-mitochondria contact  
220 subdomains we performed a morphological analysis of ORP5 localization by immuno-  
221 EM (IEM) on ultrathin cryosections from HeLa cells transfected with HA-ORP5 or  
222 EGFP-ORP5 (as endogenous ORP5/8 levels are too low to be detected by IEM). We

223 previously reported that about 20% of ORP5 or ORP8 gold particles were associated  
224 to ER-mitochondria contact sites when individually expressed (Galmes et al., 2016).  
225 The advantage of analyzing ORP5 localization is its preferential localization to contact  
226 sites, when expressed alone, as compared to ORP8 (Galmes et al., 2016), which  
227 remains also largely present within the reticular ER. Interestingly, the majority of ORP5  
228 gold particles was found to localize to ER elements in a very close proximity (86%  
229 within 0-100 nm distances, 50% of which within 50 nm) to the CJ (arrow, Fig. 3a-b),  
230 tubular structures that connect the IMM to the cristae. To exclude that ORP5  
231 localization near CJ is not a consequence of its distribution throughout the ER  
232 membranes, we sought to determine if other ER proteins have a similar frequency of  
233 proximity to CJ. Thus, we compared ORP5 localization to Sec61 $\beta$ , a subunit of the  
234 Sec61 complex involved in protein translocation in the ER, which is present in ER  
235 elements distributed throughout the cells and very little at ER-mitochondria contact  
236 sites (Galmes et al., 2016). Co-immunolabeling of EGFP-ORP5 or EGFP-Sec61 $\beta$  and  
237 protein disulfide isomerase (PDI) to stain the ER, confirmed ORP5 localization in ER  
238 elements close to CJ (arrow, Fig. 3c) but not of Sec61 $\beta$ , the bulk of which localized on  
239 ER membranes distant from the CJ (0% within 0-100nm and 69% >200nm distance)  
240 even when close to mitochondria (Fig. 3b and arrowheads in Fig. 3c). Hence, our  
241 results support the conclusion that ORP5 specifically localizes to ER-mitochondria  
242 contact sites closely associated to CJ. Interestingly, in yeast, CJ were shown to be  
243 closely associated to OMM-IMM contact sites tethered by the MICOS complex (Harner  
244 et al., 2011). IEM analysis using Mitofilin-EGFP, an EGFP-tagged construct of the  
245 human orthologue of the central component of the MICOS complex, confirmed that  
246 human Mitofilin, similarly to its yeast orthologue, preferentially localizes to the IMM in  
247 close proximity of CJ and in the cristae that arise from them (arrow, Fig. 3a). These

248 results suggest that ER-mitochondria contact sites where ORP5/8 localize could be  
249 physically connected to the intra-mitochondrial membrane contact sites near CJ.

250 To identify binding partners of ORP5/8 at ER-mitochondria contact sites we carried  
251 out a MS-analysis on GFP-pull downs from cells expressing EGFP-ORP5, EGFP-  
252 ORP5 $\Delta$ PH (an ORP5 variant lacking the PM-targeting PH domain that is localized at  
253 ER-mitochondria but not at ER-PM contact sites)(Fig. S3b), or EGFP alone as a control  
254 (Fig. 4a). As expected, the highest hit detected in both EGFP-ORP5 and EGFP-  
255 ORP5 $\Delta$ PH pull-downs was ORP8. In accord to our previous study (Galmes et al.,  
256 2016), the mitochondrial protein PTPIP51 was also detected in the mass spectrometry  
257 analysis. Interestingly, several new outer mitochondrial membrane proteins (listed in  
258 Fig. 4a) were also found as major hits. Among these proteins the Sorting Assembly  
259 Machinery Subunit 50 (SAM50), a central component of the SAM protein complex  
260 involved in the import and assembly of mitochondria  $\beta$ -barrel proteins in the OMM  
261 (Hohr et al., 2018), had one of the highest scores (Fig. 4a).

262 SAM50 is part of the Mitochondrial intermembrane space bridging (MIB) complex,  
263 composed of metaxin-1, metaxin-2 and the MICOS complex that anchors the OMM to  
264 the IMM at CJ (Huynen et al., 2016, Ott et al., 2015). SAM50 is also known to directly  
265 bind the central component of the MICOS complex Mitofilin (Ott et al., 2015).  
266 Consistently, Mitofilin was also detected in the MS of EGFP-ORP5 and EGFP-  
267 ORP5 $\Delta$ PH pull-downs (Fig. 4a). Interestingly, SAM50 and Mitofilin showed a higher  
268 interaction score in EGFP-ORP5 $\Delta$ PH immunoprecipitates, as compared to EGFP-  
269 ORP5. To verify that the overexpression of ORP5 or ORP5 $\Delta$ PH did not affect the  
270 protein levels of SAM50 and Mitofilin, WB analysis using anti-actin as loading control  
271 was carried out on cells expressing EGFP-ORP5, EGFP-ORP5 $\Delta$ PH or EGFP alone.  
272 Our results show that neither EGFP-ORP5 nor EGFP-ORP5 $\Delta$ PH overexpression

273 alters the amount of SAM50 and Mitofilin proteins as compared to the overexpression  
274 of EGFP alone (Fig. 4b). Of note, metaxin-2, and RHOT2, other components of the  
275 MIB/MICOS complex, localized to the outer mitochondrial membrane, were also  
276 detected in the MS of immunoprecipitated EGFP-ORP5 and EGFP-ORP5 $\Delta$ PH,  
277 although the score of metaxin-2 in the EGFP-ORP5 was lower than the assigned  
278 threshold (50) (Fig. 4a).

279 To confirm ORP5/8 interaction with SAM50 and Mitofilin, GFP-pull down  
280 experiments from HeLa cells expressing EGFP-ORP5, EGFP-ORP8 or EGFP alone  
281 were carried out (Fig. 4c). Consistent with the MS data, endogenous SAM50 and  
282 Mitofilin were recovered with both EGFP-ORP5 and EGFP-ORP8 but not with EGFP  
283 alone, confirming specific interaction of ORP5 and ORP8 with SAM50 and Mitofilin.

284 Next, to determine the domains involved in the interaction of ORP5/8 with the  
285 MIB/MICOS complex, GFP-pull down experiments were carried out from cells  
286 expressing EGFP-tagged ORP5 (EGFP-ORP5 $\Delta$ PH) or ORP8 (EGFP-ORP8 $\Delta$ PH) PH  
287 domain deleted constructs (Fig. S3b), and compared to the full-length proteins (EGFP-  
288 ORP5 and EGFP-ORP8) or to the EGFP alone. In accord with the MS data, the  
289 deletion of the PH domain increased ORP5 and ORP8 interaction with SAM50, as  
290 compared to the full-length proteins (Fig. 4d). Confocal analysis of ORP5 and SAM50  
291 localization on cells expressing EGFP-ORP5 or EGFP-ORP5 $\Delta$ PH and stained with an  
292 anti-SAM50 antibody confirmed the stronger enrichment of the  $\Delta$ PH ORP5 construct  
293 at ER elements in contact with the SAM50-labeled mitochondria as compared to the  
294 full-length ORP5 (Fig. S3a).

295 As the PH domain is not required for the interaction with SAM50, we further  
296 investigated the role of the other domains of ORP5 in such interaction by  
297 immunoprecipitating ORP5 deletion mutants for the ORD or the TM domains (EGFP-

298 ORP5 $\Delta$ ORD, EGFP-ORP5 $\Delta$ TM) (Fig. S3b, Fig. 4d). While the deletion of the ORD  
299 domain did not affect the interaction between ORP5 and SAM50, the deletion of the  
300 TM domain decreased the amount of SAM50 co-immunoprecipitated with ORP5,  
301 indicating that ORP5 should be properly anchored to the ER to localize at ER-  
302 mitochondria contact sites and to interact with SAM50 (Fig. 4d).

303 To confirm the interaction between ORP5/8 and SAM50 at endogenous level, as  
304 an anti-ORP5 antibody from a different specie than SAM50 was not available, we took  
305 advantage of the available antibodies against ORP8 and SAM50 from different species  
306 and analyzed their interaction using PLA (duolink) by confocal imaging in control HeLa  
307 cells and in cells where SAM50 was downregulated by RNAi (siSAM50). PLA signals  
308 corresponding to ORP8-SAM50 endogenous interaction were detected at ER-  
309 mitochondria contact sites in control cells (Fig. 4e). Also, a decrease of about 40% of  
310 ORP8-SAM50 PLA was found in siSAM50 cells, in accord with the decrease of the  
311 levels of SAM50 protein of about 40-50% assessed by WB, and validating the  
312 specificity of ORP8-SAM50 interaction (Fig. 4e-g).

313 To investigate a possible role of SAM50 and Mitofilin in regulating the levels of  
314 ORP5/8 at MAMs we analyzed their endogenous interaction by PLA and confocal  
315 microscopy in HeLa cells where either SAM50 or Mitofilin were knocked-down by  
316 siRNA oligos. Interestingly, a significant decrease (of about 40%) in ORP5/8 interaction  
317 was found in both SAM50- and Mitofilin-knockdown cells, as compared to control cells  
318 (Fig. 5a-b), indicating a synergistic effect of SAM50/mitofilin on ORP5-ORP8  
319 interaction.

320 To verify the possibility of an indirect effect of SAM50 or Mitofilin silencing on the  
321 morphology and abundance of MAMs we carried out an ultrastructural analysis by  
322 conventional EM and HRP-KDEL EM (carrying a horseradish peroxidase (HRP) tagged

323 with an ER retention motif to stain the ER) in Mitofilin or SAM50 silenced cells.  
324 Morphological analysis by conventional EM showed that transient (48 hours)  
325 knockdowns of SAM50 or Mitofilin induce formation of multilamellar cristae, almost  
326 devoid of CJ (Fig. S4a-b), complementing previous observations by other groups  
327 through stable disruption of the MICOS/MIB functions (Ding, Wu et al., 2015, Ott et al.,  
328 2015). However, in both SAM50 and Mitofilin knockdown cells ER-mitochondria contact  
329 sites were still present and their morphology not altered (Fig. 5c-d). Quantitative  
330 morphological analysis by HRP-KDEL EM in control and SAM50 or Mitofilin silenced  
331 cells confirmed that the abundance of ER-mitochondria contact sites was not altered  
332 by SAM50 or Mitofilin knockdown (Fig. 5c-d), indicating that the effects on ORP5/8  
333 interaction at MAMs were not indirectly due to a global rearrangement of the ER-  
334 mitochondria contact sites.

335 Overall our data reveal a novel interaction between ORP5/8 and the MIB/MICOS  
336 complex at ER subdomains associated to intra-mitochondrial membrane contacts  
337 facing CJ, and a direct role of the MIB/MICOS complex in ORP5/8 targeting/interaction  
338 at MAMs.

339

#### 340 **ORP5/8 and the MIB/MICOS complex regulate PS-to-PE conversion at the ER-** 341 **mitochondria interface**

342 ORP5 and ORP8 role in lipid transport at ER-mitochondria contacts still remains to be  
343 established. We hypothesized that ORP5 and ORP8 could mediate PS transport at the  
344 ER-mitochondria interface. As the ER-derived PS is the major precursor for  
345 mitochondrial PE, if ORP5 and ORP8 mediate non-vesicular transport of PS from the  
346 ER to the mitochondria, then their absence should lead to a reduction of mitochondrial  
347 PE.

348 To test whether ORP5 and ORP8 regulate levels of mitochondrial PE *in situ*, we  
349 used Percoll gradient-based subcellular fractionation (as in (Galmes et al., 2016)) to  
350 isolate pure mitochondria from HeLa cells where ORP5 or ORP8 were transiently  
351 silenced by RNAi. We chose to use a transient knockdown as it overcomes the limits  
352 and/or compensatory effects on lipid transport/biosynthetic pathways that other stable  
353 approaches could induce. The purity of mitochondria and of the other subcellular  
354 fractions was verified in control, ORP5 and ORP8 knockdown conditions by western  
355 blotting (WB) (Fig. 6a). As controls for the purity of subcellular fractions, the samples  
356 were probed for cytochrome c as mitochondrial marker and IP3R-3 as a MAM-enriched  
357 marker. All markers were highly enriched in their respective fractions and were absent  
358 in the others. In accord with our previous study (Galmes et al., 2016), ORP5 and ORP8  
359 were enriched in the MAM fraction and absent in the mitochondria fraction of control  
360 cells (Fig. 6a). On the contrary, they were strongly suppressed in ORP5 and ORP8  
361 knockdown cell lysates and in the respective MAM fractions (Fig. 6a). The PE content  
362 of purified mitochondria from ORP5 and ORP8 knockdown was then analyzed by mass  
363 spectrometry (MS)-based lipidomics, which revealed a reduction of PE levels in  
364 mitochondria isolated from ORP5 and ORP8 knockdown cells of 34% and 20%,  
365 respectively, as compared to control cells (Fig. 6b). Interestingly, PE levels of the total  
366 cells were unchanged, indicating a specific effect of ORP5 or ORP8 depletion on  
367 mitochondrial PE. These data suggest that ORP5 and ORP8 could transfer PS at ER-  
368 mitochondria contact sites.

369 We, then, sought to investigate the ability of ORP5 and ORP8 ORD domains  
370 (ORD5 and ORD8) to transfer PS *in vitro*. So far, only the ORD of ORP8 has been  
371 studied for its lipid transfer activity *in vitro*, and it has been shown to transfer PS between  
372 liposome membranes in counter-transport with PI4P or PIP<sub>2</sub> *in vitro* (Chung et al. 2015;



373 Ghai et al, 2017). However, the *in vitro* lipid transfer activity of ORP5 ORD domain has  
374 not been studied yet. Also, no study so far has addressed either the ability of ORD5 and  
375 ORD8 to transfer PS in the absence of a gradient of PI4P or PIP<sub>2</sub> or other phospholipids  
376 than PS between liposomes *in vitro*. Thus, to compare and study their role in the transfer  
377 of phospholipids *in vitro*, we purified the recombinant ORD5 (aa 265-703) and ORD8 (aa  
378 328-767) from bacteria (*Escherichia coli*) (Fig. S5a) and measured their ability to transport  
379 fluorescent phospholipids (TopFluor-PS, -PC or -PE) from donor to acceptor liposomes *in*  
380 *vitro*. Donor liposomes containing fluorescent phospholipids and biotinylated lipids  
381 (liposomes composed of 1 mol% TopFluor-PS, -PC or -PE, 2 mol% biotinylated-PE, and  
382 97 mol% POPC) were first immobilized on streptavidin beads and then mixed with  
383 acceptor liposomes (composed of 100 mol% POPC) in the presence or absence of  
384 ORP5/8 ORD domains (Fig. S5b). After 1 hour at 37°C, acceptor liposomes were  
385 recovered from the supernatant and their fluorescence was measured (Fig. S5b). Our  
386 results show that both ORD5 and ORD8 transfer PS, but not PC and PE, from donor to  
387 acceptor liposomes (Fig. S5c). They also reveal that ORD5 and ORD8 share equivalent  
388 ability to transfer PS *in vitro*. To confirm that fluorescent lipids were indeed transferred to  
389 the acceptor liposomes, a fraction of the reaction supernatant was floated on a Nycodenz  
390 density gradient by ultracentrifugation and the fluorescence in the top fraction of the  
391 gradient (containing floated acceptor liposomes) was measured (Fig. S5d). Fluorescence  
392 of TopFluor-PS in the acceptor liposomes was maintained after their floatation, confirming  
393 its effective transfer between liposomes *in vitro*.

394 In subsequent experiments, we measured the levels of mitochondrial PE newly  
395 synthesized from the ER-derived PS by using a radiometric PS-to-PE conversion  
396 assay *in situ* (Shiao, Lupu et al., 1995) in silenced or control HeLa cells (Fig. 6c). This  
397 assay allows the monitoring of PS transfer from the ER to mitochondria by measuring



398 the levels of radioactive PS and PS-derived PE by thin layer chromatography (TLC)  
399 after 18h of incorporation of radioactive L-[<sup>3</sup>H(G)]-serine into the cells. A significant  
400 decrease in the levels of newly synthesized PE was found in ORP5 knockdown and in  
401 ORP5+ORP8 double-knockdown cells (Fig. 6c). The decrease was stronger in  
402 ORP5+ORP8 double-knockdown cells, indicating a cooperative effect of ORP5 and  
403 ORP8 in this process. A slight, not statistically significant decrease was also found in  
404 ORP8 knockdown cells, suggesting a major role of ORP5 compared to ORP8 in PS  
405 transfer at ER-mitochondria contact sites *in situ*. As [<sup>3</sup>H]-serine radioactivity could be  
406 incorporated to PE also *via* an alternative pathway involving sphingosine (Hanada,  
407 Nishijima et al., 1992), we next sought to address the contribution of this pathway to  
408 PE labeling, by repeating the experiments in control and ORP5 knockdown cells in the  
409 presence of  $\beta$ -chloro-L-alanine, an inhibitor of serine palmitoyltransferase (Chen, Born  
410 et al., 1993). The PS-to-PE conversion was not significantly affected in both control  
411 (~3% of reduction) and ORP5 knockdown cells (~9% of reduction). On the contrary,  
412 PS-to-PE conversion was significantly reduced in  $\beta$ -chloro-L-alanine treated and  
413 untreated ORP5 knockdown cells (~17% and ~23% respectively), as compared to  
414 control (Fig. 6d). These data show that more than 90% of the serine labeling of PE  
415 occurs *via* PS in HeLa cells, in accord with a previous work in another cell type, the  
416 Baby Hamster Kidney fibroblasts (BHK cells), showing that only a minor PE species are  
417 labeled from the sphingosine-PE pathway (Heikinheimo & Somerharju, 1998).  
418 Additionally, the decrease in PE could be due to a decrease in the protein levels of the  
419 PS-decarboxylase (PISD) or the PS-Synthase 1 (PSS1) enzymes mediating PS-to-PE  
420 conversion on mitochondria or PS synthesis in the ER, respectively. To exclude this  
421 possibility we analyzed the protein levels of PISD and PSS1 by WB in ORP5, ORP8,  
422 ORP5+ORP8 knockdown cells and compared them to control cells (Fig. S5e). We

423 found no significant difference but rather a slight increase in the enzymes upon ORP5  
424 and/or ORP8 knockdowns. Overall these data confirm that the reduction in  
425 mitochondrial PE induced by depletion of ORP5 is essentially due to the decrease in  
426 PS transfer from the ER to the mitochondria (Fig. S5g).

427 Even a modest reduction (22-27%) of mitochondrial PE levels in mammalian cells  
428 has been shown to profoundly alter the morphology of mitochondrial cristae as well as  
429 mitochondria functions (Tasseva, Bai et al., 2013). Accordingly, ORP5 and ORP8  
430 knockdowns lead to alterations of mitochondria morphology (Galmes et al., 2016).  
431 However, the impact of ORP5 and ORP8 knockdowns on the abundance of ER-  
432 mitochondria contact sites remain unclear.

433 To test whether the effects on PS transport at ER-mitochondria contacts were  
434 specific for ORP5 and ORP8 loss of function or simply due to a decrease of ER-  
435 mitochondria contacts induced by their knockdown, we quantified the abundance of  
436 ER-mitochondria contact sites by EM in control and ORP5, ORP8, ORP5+ORP8  
437 knockdown cells. To facilitate the visualization of the ER we transfected the cells with  
438 a HRP-KDEL construct that stains the ER with a dark signal. Our quantifications  
439 revealed that ORP5, ORP8 or ORP5+ORP8 knockdowns did not affect the extent of  
440 ER-mitochondria contact sites (Fig. 6e-f). These results indicate that ORP5 and ORP8  
441 act as LTPs rather than tethers (Fig. 7, S5g). Additionally, 52% of mitochondria in  
442 ORP5+ORP8 double-knockdown cells display aberrant cristae morphology versus 9%  
443 in control cells (Fig. 6e, S5f). These defects in cristae morphology were also observed  
444 by conventional EM (Fig. S4a) and were similar to those previously shown in the case  
445 of ORP5 and ORP8 individual knockdowns (Galmes et al., 2016). However, the % of  
446 mitochondria with altered morphology in ORP5+ORP8 double-knockdown cells was  
447 higher as compared to ORP8 knockdown (Galmes et al., 2016), possibly reflecting the

448 stronger effect of ORP5+ORP8 double-knockdown on PS transport at ER-  
449 mitochondria contact sites (Fig. 6c).

450 Decreased levels of PE strongly affect the organization of the mitochondrial  
451 respiratory supercomplexes (Tasseva et al., 2013). We had previously shown that  
452 ORP5 knockdown induces a reduction in the basal mitochondrial oxygen consumption  
453 rate ( $OCR_{BAS}$ ), indicative of reduced respiratory activity (Galmes et al., 2016).  
454 However, it remains still questioned whether ORP8 could also reduce  $OCR_{BAS}$  and/or  
455 if this reduction could be exacerbated under metabolic stress conditions. Thus, we  
456 monitored mitochondrial OCR in control, in ORP5 and in ORP8 knockdown cells in  
457 basal and in stress conditions (Fig. S6). ORP5 knockdown induced a significant  
458 reduction in both  $OCR_{BAS}$  (~37%) and OCR upon FCCP treatment ( $OCR_{FCCP}$ ) (~36%).  
459 Interestingly, also ORP8 knockdown induced a significant decrease in  $OCR_{BAS}$  (~31%)  
460 and  $OCR_{FCCP}$  (~29%), although the decreases were less prominent than upon ORP5  
461 knockdown. These data uncover a novel role of ORP5 and ORP8 in preserving  
462 mitochondrial respiratory activity in basal and in stress conditions, and a major impact  
463 of ORP5 in this process, in accord with its major role in PS transfer at ER-mitochondria  
464 contact sites.

465 To test whether the interaction of ORP5 with the MIB complex could facilitate  
466 the non-vesicular transfer of PS from the ER to the mitochondrial membranes (and  
467 consequently synthesis of mitochondrial PE) we depleted ORP5, SAM50 or Mitofilin  
468 alone or in combination by RNAi and analyzed the content in mitochondrial PE  
469 newly synthesized from PS using the same radiometric PS-to-PE conversion assay  
470 *in situ* as described above. Robust knockdown of ORP5, SAM50 or Mitofilin was  
471 confirmed by western blotting after 48 hours (Fig. 6g). Analysis of PS-derived newly  
472 synthesized PE revealed a significant decrease in PE in ORP5 and Mitofilin

473 knockdown cells (Fig. 6h). Moreover, the double-knockdown of ORP5 and Mitofilin  
474 had an additive effect, supporting a cooperation of these two proteins in the same  
475 process (PS transport/PE synthesis). However, the levels of PE were not changed  
476 in SAM50 knockdown cells as compared to control. This can be explained by the  
477 fact that other subunits of the MIB complex (*i.e.* Mitofilin) might compensate for its  
478 depletion. Indeed, protein levels of Mitofilin are increased in SAM50 knockdown  
479 cells (Fig. 6g). Interestingly, also the levels of both ORP5 protein and RNA are  
480 increased in SAM50 knockdown cells (Fig. 6g, S3b). Accordingly, the double-  
481 silencing of SAM50 and either ORP5 or Mitofilin had a significant impact on PE  
482 synthesis (Fig. 6h). Moreover, the reduction in PE was even stronger as compared  
483 to the individual knockdowns indicating that disruption of both a component  
484 implicated in a direct transport of PS at ER-mitochondria contact sites and a  
485 component of the OMM-IMM tethering complex has a significant impact on PE  
486 synthesis.

487 Morphological analysis by conventional EM in all these knockdown conditions was  
488 carried out, showing that transient double-knockdowns of ORP5+Mitofilin,  
489 ORP5+SAM50 and SAM50+Mitofilin, similarly to the individual knockdowns of SAM50  
490 and Mitofilin, induces formation of multilamellar cristae, almost devoid of CJ (Fig. S4a-  
491 b). However, in all double-knockdown conditions analyzed ER-mitochondria contact sites  
492 were still present and their morphology not altered, as shown for the individual  
493 knockdowns of ORP5/8 (Fig. 6f), SAM50 and Mitofilin (Fig. 5c-d), indicating that the  
494 effects on PS-derived PE synthesis were specifically due to Mitofilin or SAM50 loss of  
495 function effects on intra-mitochondrial membrane bridges.

496 Overall our results reveal that ORP5/8 cooperate with the MIB/MICOS complex to  
497 regulate the transfer of PS from the ER to the mitochondrial membranes necessary for

498 synthesis of mitochondrial PE and consequently for maintaining mitochondrial cristae  
499 morphology and respiration (Fig. 7).

500

## 501 **DISCUSSION**

502 In this study, by using a combination of biochemical and imaging approaches, we  
503 uncover for the first time the endogenous localization of ORP5 and ORP8, revealing that  
504 they are mainly localized at ER-mitochondria contact sites (Fig. 1-2 and Fig. S1-2), and  
505 providing novel evidence for a physiological relevance of the ORP5/8 complex at MAMs.  
506 So far, ORP5 and ORP8 localization have been only studied in conditions where one of  
507 these two partner proteins were expressed in high excess as compared to the other one.  
508 Previous studies, including one from our group, have shown that overexpression of ORP5  
509 induces an increase of ER-PM contacts where the protein also localizes (Chung et al.,  
510 2015, Galmes et al., 2016). Consequently, several following studies have addressed the  
511 role of ORP5 and ORP8 at ER-PM contacts, overlooking their function at MAM. However,  
512 the increase in cortical ER observed upon ORP5 overexpression does not reflect the  
513 physiological abundance of ER-PM contacts, as the cortical ER in non-specialized cells  
514 generally covers not more than 5% of the plasma membrane surface. Indeed, we have  
515 found that the increased localization of ORP5 to cortical ER when over-expressed alone  
516 does not reflect its endogenous localization when it is in complex with ORP8, which is  
517 instead enriched at MAMs. Our findings have important implications for a better  
518 understanding of the physiological localization and function of ORP proteins, but also of  
519 other proteins that assemble in multimeric complexes at ER-mediated membrane contact  
520 sites, such as the E-Syts (Giordano, Saheki et al., 2013).

521 Our study also reveals that ORP5/8 physically interact with SAM50 and Mitofilin,  
522 two key components of the MIB/MICOS complex that anchor the IMM to the OMM at the

523 level of CJ (Huynen et al., 2016, Ott et al., 2015, Wollweber et al., 2017). The biochemical  
524 interaction between ORP5 and SAM50/Mitofilin uncovers the existence of a novel physical  
525 link between ER-mitochondria contact sites involved in lipid transport and intra-  
526 mitochondrial membrane contacts. ORP5 localization by IEM at ER-mitochondria contact  
527 sites near the CJ, where Mitofilin and MICOS complex also reside, further confirms the  
528 existence of such tripartite membrane contact site structure. Moreover, knockdown of  
529 SAM50 and Mitofilin does not affect ER-mitochondria contact sites, but perturbs the  
530 interaction of ORP5/8 at MAMs.

531 Importantly, here we describe a new function of ORP5 and ORP8 in the maintenance  
532 of mitochondrial levels of PE, an essential phospholipid of mitochondria, providing the first  
533 evidence of mammalian LTPs directly mediating non-vesicular transfer of PS (lipid  
534 precursor of mitochondrial PE) from the MAMs to the mitochondria at ER-mitochondria  
535 contact sites.

536 In yeast, large tethering complexes such as the ERMES and the ER-Membrane  
537 protein Complex (EMC) have been previously involved in phospholipid trafficking (PC  
538 and PS, respectively) between the ER and the mitochondrial membranes (Tamura &  
539 Endo, 2017) (Lang, John Peter et al., 2015). For instance, three subunits of the  
540 ERMES complex contain a Synaptotagmin-like Mitochondria lipid binding Protein  
541 (SMP) domain that forms a hydrophobic lipid transport cavity shared by other proteins  
542 of the tubular lipid-binding protein TULIP superfamily (Kopec, Alva et al., 2010,  
543 Reinisch & De Camilli, 2016). However, a direct role (independent of its tethering  
544 function) of ERMES in lipid transport at ER-mitochondria contact sites is still  
545 questioned. For a long time homologues of the ERMES complex have not been  
546 identified in metazoans. Hirabayashi et al. recently showed that the SMP-containing  
547 protein PDZD8 is involved in ER-mitochondria tethering and in the regulation of  $Ca^{2+}$

548 dynamics in mammalian neurons (Hirabayashi et al., 2017). Although PDZD8 is a  
549 structural and functional paralogous of the Mmm1 subunit of the ERMES complex  
550 (Wideman et al., 2018), its function in lipid transport at ER-mitochondria contact sites  
551 remain unclear. The EMC complex, which has been involved in PS shuttling at ER-  
552 mitochondria contact sites in yeast, is instead highly conserved in metazoans  
553 (Wideman, 2015). However, no lipid-binding/transfer domain has been found in the  
554 EMC proteins, indicating that their implication in lipid transfer at ER-mitochondria  
555 contacts is linked to their tethering function rather than to a direct lipid transfer activity.  
556 Recently, the mammalian LTP VPS13A has been shown to localize to contact sites  
557 including ER-mitochondria contacts (Kumar et al., 2018). VPS13A contains a lipid-  
558 binding domain (VPS13 $\alpha$ ) that has the ability to harbor multiple phospholipids at once  
559 and transfer them between liposomes *in vitro*. However, its role in lipid transfer at ER-  
560 mitochondria membrane contact sites *in situ* has not yet been established. Differently  
561 from the SMP and VPS13 $\alpha$  domains that can simultaneously host multiple  
562 phospholipids, the ORD domain of Osh/ORPs forms a cavity that can host only one  
563 lipid at a time (Maeda, Anand et al., 2013, Wang, Ma et al., 2019).

564 An important finding of our work is that ORP5 and ORP8 knockdowns do not affect  
565 the extent of ER-mitochondria contact sites, revealing that the main function of ORP5/8  
566 at MAMs is lipid transfer and not membrane tethering. This is a unique feature among  
567 the LTPs that have been identified so far at MAMs. For instance, knockdowns of other  
568 LTPs such as ERMES in yeast, or PDZD8 and VPS13A in mammals, result in a  
569 decrease of ER-mitochondria contact sites (Hirabayashi et al., 2017, Kornmann, Currie  
570 et al., 2009, Kumar et al., 2018), making difficult to dissect the lipid transfer activity  
571 from the tethering function of these LTPs. Thus, ORP5/8 represent so far a unique  
572 example of LTPs that specifically mediate lipid transport at ER-mitochondria contact



573 sites, independently of membrane tethering, and that can be used as unique tools to  
574 specifically study lipid transport at MAMs.

575       ORP5 and ORP8 have been previously shown to counter-exchange PS with the PM  
576 phosphoinositides PI4P and PIP<sub>2</sub> at ER-PM contact sites in HeLa cells (Chung et al.,  
577 2015, Ghai, Du et al., 2017). However, PI4P and PIP<sub>2</sub> are not present on the  
578 mitochondrial membranes, while PE is highly abundant in these membranes, in  
579 addition to being an essential lipid of all biological membranes. Our *in vitro* data show  
580 that the ORD domains of ORP5 and ORP8 transport PS, but not other phospholipids such  
581 as PE and PC, indicating a specific role of ORP5/8 in PS transport and excluding the  
582 possibility that ORP5/8 might also participate in the transport of a fraction of PE back  
583 to the ER. It is possible that ORP5/8 cooperate with other LTPs, such as VPS13A, for the  
584 exchange of other lipids (including PE) at ER-mitochondria contact sites. Importantly,  
585 we have confirmed the role of ORP5/8 in PS transfer by measuring a decrease of PS-  
586 derived mitochondrial PE in ORP5 depleted HeLa cells *in situ* (and even more upon  
587 ORP5+8 silencing) as well as a reduction of total PE in mitochondria isolated from  
588 these cells (Fig. 6a-d). Accordingly, the knockdown of ORP5/8 affects cristae  
589 morphology and the respiratory function of mitochondria (Galmes et al., 2016)(Fig. 6e-  
590 f, S6), all phenotypes that are expected in the case of decrease in mitochondrial PE  
591 (Joshi et al., 2012, Steenbergen et al., 2005). Our data further confirm the essential  
592 role of PE in the maintenance of mitochondrial structure and functions, and are in  
593 accord with those of (Tasseva et al., 2013) showing that even a mild decrease of  
594 mitochondrial PE can strongly alter mitochondrial cristae morphology and respiratory  
595 function. Our data also suggest that the gradient of PS at ER-mitochondria contacts is  
596 sufficient to trigger the ORP5/8-mediated transport of PS from the MAMs, where it is  
597 highly enriched, to the mitochondria membranes, where it is rapidly converted into PE



598 and is therefore present at a very low concentration. Our findings have important  
599 implications in the general field of LTPs, as they suggest that the same LTP can use  
600 different means to transfer lipids depending on the local gradients present at the  
601 specific membrane contact sites where it is localized.

602 Importantly, we also show that the *de-novo* synthesis of mitochondrial PE requires  
603 both ORP5/8 at ER-mitochondria contact sites and the MIB/MICOS complex at intra-  
604 mitochondrial OMM-IMM contact sites (Fig. 6h). Interestingly, recent evidence in yeast  
605 suggests that, in addition to the classical PE synthesis at the IMM by the IMM-localized  
606 PS-decarboxylase PISD, PE can also be synthesized *in trans* on the OMM (Aaltonen,  
607 Friedman et al., 2016). Thus, it is possible that this alternative pathway, which requires  
608 MIB/MICOS tethering function to bring the mitochondrial intermembrane domain of  
609 PISD close to the OMM for synthesis of PE, is conserved also in mammalian cells. The  
610 cooperation of ORP5 with SAM50 and Mitofilin could facilitate the movement of PS from  
611 the ER to the IMM across ER-mitochondria contact sites for synthesis of PE at the  
612 IMM, through the classical PE synthesis pathway, but also PISD function *in trans* on  
613 the OMM through this alternative biosynthetic pathway. Taken together these findings  
614 provide the first evidence of a physical and functional link between ER-mitochondria  
615 contacts and intra-mitochondrial membranes contacts maintained by the MIB/MICOS  
616 complexes, to facilitate transport of PS from the ER to the mitochondria and PE  
617 synthesis on the mitochondrial membranes (Fig. 7).

618 In conclusion, our data reveal that: 1) ORP5/8 form a protein complex that is  
619 endogenously enriched at ER-mitochondria contacts; 2) ORP5/8 constitute the molecular  
620 machinery mediating PS transfer at ER-mitochondria contact sites but not ER-  
621 mitochondria tethering; 3) ER-mitochondria contacts where ORP5/8 localize are  
622 physically associated with intra-mitochondrial contacts, maintained by the MIB/MICOS

623 complex, to facilitate the transport of PS from the ER to mitochondria membranes.  
624 Overall our study provides a first molecular clue on how lipids are transported at ER-  
625 mitochondria contact sites and novel functional insight into the complex interplay of the  
626 ER with the mitochondria and the intra-mitochondrial membrane contacts and associated  
627 machinery.

628

## 629 **METHODS**

### 630 **Cell culture, siRNA and transfection.**

631 HeLa cells were cultured in DMEM (Life Technologies) containing GlutaMax (Life  
632 Technologies) and supplemented with 10% FBS (Life Technologies) and 1%  
633 penicillin/streptomycin (Life Technologies) at 37°C and 5% CO<sub>2</sub>. Transfection of  
634 plasmids and siRNA oligos (Dharmacon, GE Healthcare) was carried out with  
635 lipofectamine 2000 and oligofectamine (Life Technologies) according to  
636 manufacturer's instructions.

637

### 638 **siRNAs oligonucleotides**

639 For knockdowns, HeLa cells were transfected with siRNA oligos by using  
640 oligofectamine (Life Technologies) and cultured for 48 hours prior to analysis.

641 Double-stranded siRNAs were derived from the following references:

| siRNA  | Company, Reference                              |
|--------|-------------------------------------------------|
| OSBPL8 | Dharmacon, J-009508-06<br>(Galmes et al., 2016) |
| OSBPL8 | Dharmacon, J-009508-05<br>(Galmes et al., 2016) |
| OSBPL5 | Dharmacon, J-009274-10<br>(Galmes et al., 2016) |
| OSBPL5 | Dharmacon, J-009274-11<br>(Galmes et al., 2016) |

|               |                                                                |
|---------------|----------------------------------------------------------------|
| SAMM50        | Dharmacon, J-017871-18                                         |
| SAMM50        | Dharmacon, J-017871-19                                         |
| Non-targeting | Dharmacon, D-001810-10                                         |
| siMitofilin   | 5' -<br>AAUUGCUGGAGCUGGCCUUTT-3'<br>(John, Shang et al., 2005) |

642

643 **Plasmids and cDNA clones**

644 EGFP-ORP5, EGFP-ORP8, EGFP-ORP5 $\Delta$ PH, EGFP-ORP8 $\Delta$ PH, EGFP-  
645 ORP5 $\Delta$ ORD and EGFP-ORP5 $\Delta$ TM were described in (Galmes et al., 2016). GFP-  
646 Sec22b and RFP-Sec22b (Gallo, Danglot et al., 2020). The following reagents were  
647 kind gifts: GFP-Sec61 $\beta$  from T. Rapoport (Harvard University)(Shibata, Voss et al.,  
648 2008), PHPLC $\delta$ -RFP (Chung et al., 2015); Mito-BFP (Addgene: # 49151); ssHRP-  
649 KDEL from T. Schikorski (Schikorski, Young et al., 2007); GST-ORD8 (ORD ORP8,  
650 corresponding to aa 328-767) from P. De Camilli (Chung et al., 2015). GECO  
651 constructs were from Robert Campbell (Addgene: CMV-R-GECO1 # 32444, CMV-  
652 mito-R-GECO1 # 46021, CMV-ER-LAR-GECO1 # 61244, CMV-mito-LAR-GECO1.2 #  
653 61245).

654

655 **Cloning of HA-ORP5, Mitofilin-GFP and GST- ORD5 (ORD ORP5)**

656 cDNAs of ORP5 (full-length), Mitofilin (full-length from FLAG-mitofilin (Ott et al., 2015))  
657 and GST-ORD5 (corresponding to aa 265-703), were amplified by PCR. In all PCR  
658 reactions, Herculase II fusion DNA polymerase (Agilent) was used.

659 Primers used were (coding sequence shown in lowercase):

660 5' AgeI-HA-ORP5\_Fw GCGGC ACCGGT cgccacc ATGTACCCATACGATGTTCCA

661 GATTACGCT atgaaggaggaggccttcctc

662 3' XhoI-STOP-ORP5\_Rv GGC CTCGAG ctatttgaggatgtggtaatg

663 5' KpnI-Mitofilin\_Fw AGACCCAAGCTT GGTACC atg  
664 3' BamHI-GC-Mitofilin\_Rv GTAATC GGATTC GC ctctggct  
665 5' Sall-TC-ORD5\_Fw GCACAG GTCGAC TC gagaccctggggcccggt  
666 3' NotI-STOP-ORD5\_Rv GCACA GCGGCCGC ctactgtggccggagggtggtcg

667 For the HA-ORP5 cloning the PCR product (carrying the HA tag at the N-  
668 terminus of ORP5) was ligated between AgeI and XhoI in the pEGFP-C1 vector  
669 (Clontech) and replacing the GFP- with the HA-tag. For the other clonings the PCR  
670 products were ligated between KpnI and BamHI for Mitofilin, and between Sall and  
671 NotI for ORD5, in the pEGFP-N1 vector (Clontech) to generate Mitofilin-EGFP or in  
672 the pGEX-6P-1 to generate GST-ORD5.

673

#### 674 mRNA analyses by quantitative reverse transcriptase PCR (qPCR)

675 Total RNA was isolated from HeLa cells transfected with siRNAs for 48 hours as  
676 described above, by using a Purelink™ kit (Ambion/Thermo Scientific, Foster City,  
677 CA). The RNA (0.5 µg per specimen) was reverse transcribed with a SuperScript  
678 VILO™ cDNA synthesis kit (Invitrogen/Thermo Scientific, Carlsbad, CA) according to  
679 the manufacturer's protocol. Quantification of the mRNAs of interest was carried out  
680 on a Roche Lightcycler™ 480 II instrument by using SYBR-Green I Master mix (Roche,  
681 Basel, Switzerland) and primers specified in Table SX. Succinate dehydrogenase  
682 complex. subunit A, the mRNA of which remained markedly stable under the present  
683 conditions, was employed as a reference housekeeping mRNA. Relative mRNA levels  
684 were calculated by using the  $-\Delta\Delta C_t$  method.

685 Sequences of the primers used for qPCR:

| mRNA                 | Sequence 5'-3'              |
|----------------------|-----------------------------|
| SDHA* (housekeeping) | Fw: CATGCTGCCGTGTTCCGTGTGGG |

|           |                                     |
|-----------|-------------------------------------|
|           | Rv:<br>GGACAGGGTGTGCTTCCTCCAGTGCTCC |
| ORP5      | Fw: GTGCCGCTGGAGGAGCAGAC            |
|           | Rv: AGGGGCTGTGGTCCTCGTATC           |
| SAMM50    | Fw: CAAGTGGACCTGATTTTGGAGG          |
|           | Rv: AGACGGAGCAATTTTTCACGG           |
| Mitofilin | Fw: GTTGTATCTCAGTATCATGAGCTGG       |
|           | Rv: GTTCAGCTGATCAATACGACGA          |

686 \*succinate dehydrogenase complex, subunit A

687

688 **Antibodies, dyes and reagents list**

689 Primary antibodies used in this study were:

|               | Antibody      | Company & Reference                  |
|---------------|---------------|--------------------------------------|
| WB            | IP3R-3        | BD Transduction Laboratories, 610312 |
| WB/IF/DUO     | ORP5          | SIGMA, HPA038712                     |
| WB            | ORP5          | SIGMA, HPA058727                     |
| WB            | beta-Actin    | Abcam, ab8226                        |
| DUO/IF        | ORP8          | Santa Cruz,                          |
| WB/IF/DUO     | ORP8          | GeneTex, GTX121273                   |
| IF,<br>WB,DUO | SAMM50        | SIGMA, HPA034537                     |
| WB            | Mitofilin     | Proteintech, 10179-1-AP              |
| WB            | PDI           | GeneTex, GTX30716                    |
| WB            | VAPB          | SIGMA, HPA013144                     |
| WB            | PSS1 (PTDSS1) | SIGMA, HPA016852                     |
| WB            | PISD          | SIGMA, HPA031090                     |
| IF, WB        | GFP           | Roche, 11814460001                   |
| IEM           | GFP           | Life technologies, A11122            |
| IEM           | PDI           | Genetex, GTX30716                    |

|    |                        |                            |
|----|------------------------|----------------------------|
| IF | HA                     | SIGMA, H3663               |
| IF | FLAG M2                | SIGMA, F1804               |
| IF | MitoTracker®<br>CMXRos | Red<br>M7512, Invitrogen   |
| IF | MitoTracker®<br>Red FM | Deep<br>M22426, Invitrogen |

690

## 691 **Western blot**

692 For immunoblotting, cells were resuspended in lysis buffer [50 mM Tris, 150 mM  
693 NaCl, 1% Triton X-100, 10 mM EDTA, pH 7.2, and protease inhibitor cocktail (Roche)].  
694 Cell lysates were then centrifuged at 21 000 g for 20 min at 4°C. The supernatants  
695 were boiled in reducing SDS sample buffer and proteins were separated using 10%  
696 SDS-PAGE and immunoblot was carried using standard methods.

697 For Western blot quantification, bands of protein of interest were detected using  
698 ChemiDoc™ Imaging Systems (Life Science Research, Bio-Rad) and analyzed using  
699 Image Lab™ Software. All data are presented as mean ±SEM of three experimental  
700 replicates.

701

## 702 **Immunoprecipitation of ORPs**

703 HeLa cells transfected with EGFP-tagged ORPs were washed in cold PBS and  
704 lysed on ice in lysis buffer [50 mM Tris, 120 mM NaCl, 40 mM Hepes, 0.5% digitonin,  
705 0.5% CHAPS, pH 7.36, and protease inhibitor cocktail (Roche). Cell lysates were then  
706 centrifuged at 21 000 g for 20 min at 4°C. Supernatants were then incubated with  
707 Chromotek GFP-trap agarose beads (Allele Biotech) for 1 hour at 4°C under rotation.  
708 Subsequently beads were washed in 0.1 M phosphate buffer. After extensive washes  
709 in cold lysis buffer, immunoprecipitated proteins bound to the beads were processed  
710 for Mass Spectrometry analysis (see below) or incubated in sample buffer (containing

711 2% SDS) and then boiled for 1 min. In the latter case immunoprecipitates were loaded  
712 and separated in 10% SDS–PAGE gel and immunoblotting was carried out.

713

#### 714 **Cell fractionation**

715 HeLa cells ( $100 \times 10^6$  cells) were harvested 48 hours after transfection with siRNA  
716 oligos and washed with PBS by centrifugation at 600 g for 5 min. The cell pellet was  
717 resuspended in starting buffer (225 mM mannitol, 75 mM sucrose and 30 mM Tris-HCl  
718 pH 7.4) and homogenized using a Tissue Grinder Dura-Grind®, Stainless Steel,  
719 Dounce (Wheaton). The homogenate was centrifuged three times at 600 g for 5 min  
720 to remove nuclei and unbroken cells. The crude mitochondria was pelleted by  
721 centrifugation at 10 000 g for 10 min. To separate MAM and pure mitochondria  
722 fractions, the pellet was resuspended in MRB buffer (250 mM mannitol, 5 mM HEPES  
723 and 0.5 mM EGTA, pH 7.4) and layered on top of different concentrations of Percoll  
724 gradient (225 mM mannitol, 25 mM HEPES, 1 mM EGTA pH 7.4 and 30% or 15%  
725 Percoll). After centrifugation at 95 000 g for 30 min, two dense bands containing either  
726 the pure mitochondria or MAM fraction were recovered and washed twice with MRB  
727 buffer by centrifugation at 6300 g for 10 min to remove residual Percoll and residual  
728 contamination. MAM was pelleted by centrifugation at 100 000 g for 1 hour. MAMs and  
729 pure mitochondria pellets were resuspended in Lysis Buffer (50 mM Tris, 150 mM  
730 NaCl, 1% Triton X-100, 10 mM EDTA, pH 7.2, and protease inhibitor cocktail) and  
731 protein concentrations were determined by Bradford assay. Equal amount of proteins  
732 were loaded on 4-20% gradient SDS-PAGE gels (Biorad) and immunoblotting was  
733 carried out. Pure mitochondria were processed for MS-lipidomic analysis (see below).

734

#### 735 **Mass spectrometry-proteomic analysis**

736 Mass Spectrometry (MS) analysis was carried out by the proteomics/mass  
737 spectrometry platform in IJM (<http://www.ijm.fr/plateformes/spectrometrie-de-masse>).  
738 Briefly, after washes with binding buffer, immunoprecipitations beads were rinsed with  
739 100  $\mu$ l of  $\text{NH}_4\text{HCO}_3$  25 mmol/l. Proteins on beads were digested overnight at 37°C by  
740 sequencing grade trypsin (12.5  $\mu$ g/ml; Promega Madison, WI, USA) in 20  $\mu$ l of  
741  $\text{NH}_4\text{HCO}_3$  25 mmol/l. Digests were analysed by an Orbitrap Fusion (Thermo Fisher  
742 Scientific, San Jose, CA) equipped with a Thermo Scientific EASY-Spray  
743 nanoelectrospray ion source and coupled to an Easy nano-LC Proxeon 1000 system  
744 (Thermo Fisher Scientific, San Jose, CA). MS/MS data were processed with Proteome  
745 Discoverer 1.4 software (Thermo Fisher scientific, San Jose, CA) coupled to an in  
746 house Mascot search server (Matrix Science, Boston, MA; version 2.4.2). MS/MS  
747 data were searched against SwissProt databases with Homo sapiens taxonomy.  
748 The Mascot score for a protein is the summed score for the individual peptides, e.g.  
749 peptide masses and peptide fragment ion masses, for all peptides matching a given  
750 protein. For a positive protein identification, the mascot score has to be above the 95%  
751 confidence level. In Mascot, the ions score for an MS/MS match is based on the  
752 calculated probability, P, that the observed match between the experimental data and  
753 the database sequence is a random event. The reported score is  $-10\log_{10}(P)$ . A score  
754 of 200 indicates a probability of  $10^{-20}$ . Scores greater than 70 are significant, while  
755 scores lower than 40 should not be considered or carefully validated at MS/MS level  
756 (source: [http://www.matrixscience.com/help/interpretation\\_help.html](http://www.matrixscience.com/help/interpretation_help.html)). We thus set up  
757 a Mascot score threshold of 50.

758

759 **Fluorescence Microscopy**

760 ***Immunofluorescence and Confocal Microscopy***



761 HeLa cells were seeded on 13 mm glass bottom coverslips (Agar Scientific).  
762 Immunofluorescence was carried out one day after transfection. Transfected cells  
763 were fixed with 4% PFA/PBS for 15 min at room temperature, washed in PBS and  
764 incubated with 50 mM NH<sub>4</sub>Cl/PBS for 15 min at room temperature. After washing with  
765 PBS and blocking buffer (1% BSA/ 0.1% Saponin in PBS), cells were incubated with  
766 primary antibodies diluted in blocking buffer for 1 hour at room temperature and then  
767 with fluorescently-labeled secondary antibodies. After washing with blocking buffer and  
768 then PBS, coverslips were mounted on microscopy slides and images were acquired  
769 on Confocal inverted microscope SP8-X (DMI 6000 Leica). Optical sections were  
770 acquired with a Plan Apo 63x oil immersion objective (N.A. 1.4, Leica) using the LAS-  
771 X software. Fluorescence was excited using either a 405nm laser diode or a white light  
772 laser, and later collected after adjusting the spectral windows with GaAsP PMTs or  
773 Hybrid detectors. Images from a mid-focal plane are shown. Images were processed  
774 and fluorescence was analysed off line using Image J.

### 775 **Quantifications**

776 For co-localization analysis of fluorescent signals, the acquired images were  
777 processed using the JACoP plugin in ImageJ to assess the Pearson's correlation  
778 coefficient. The obtained values, ranging from 0 to 1 (1=max correlation), indicated the  
779 association between the signals analysed.

780

### 781 **Electron Microscopy Analysis**

#### 782 **Conventional EM**

783 For conventional EM, cells grown on 13 mm glass bottom coverslips (Agar  
784 Scientific) were fixed with 2.5% glutaraldehyde and 2% PFA in 0.1 M cacodylate,  
785 0.05% CaCl<sub>2</sub> buffer for 24 hours. After several washes with 0.1 M cacodylate buffer,

786 the cells were postfixed with 1% OsO<sub>4</sub>, 1.5% potassium ferricyanide in 0.1M  
787 Cacodylate for 1 hour. After several washes with 0.1 M cacodylate buffer and H<sub>2</sub>O, the  
788 cells were stained with 0.5% uranyl acetate for 24 hours. After several washes with  
789 H<sub>2</sub>O, the cells were dehydrated in ethanol and embedded in Epon while on the  
790 coverslips. Ultrathin sections were prepared, counterstained with uranyl acetate and  
791 observed under a MET JEOL 1400 equipped with a Orius High speed (Gatan) camera.

### 792 ***HRP Detection***

793 HeLa cells expressing HRP-KDEL were fixed on coverslips with 1.3%  
794 glutaraldehyde in 0.1 M cacodylate buffer, washed in 0.1 M ammonium phosphate [pH  
795 7.4] buffer for 1 hour and HRP was visualized with 0.5 mg/ml DAB and 0.005% H<sub>2</sub>O<sub>2</sub>  
796 in 0.1 M Ammonium Phosphate [pH 7.4] buffer. Development of HRP (DAB dark  
797 reaction product) took between 5 min to 20 min and was stopped by extensive washes  
798 with cold water. Cells were postfixed in 2% OsO<sub>4</sub>+1% K<sub>3</sub>Fe(CN)<sub>6</sub> in 0.1 M cacodylate  
799 buffer at 4°C for 1 hour, washed in cold water and then contrasted in 0.5% uranyl  
800 acetate for 2 hours at 4°C, dehydrated in an ethanol series and embedded in epon as  
801 for conventional EM. Ultrathin sections were counterstained with 2% uranyl acetate  
802 and observed under a FEI Tecnai 12 microscope equipped with a CCD (SiS 1kx1k  
803 keenView) camera.

### 804 ***Immunogold labelling***

805 HeLa cells were fixed with a mixture of 2%PFA and 0.125% glutaraldehyde in  
806 0.1 M phosphate buffer [pH 7.4] for 2 hours, and processed for ultracryomicrotomy as  
807 described previously (Slot & Geuze, 2007). Ultrathin cryosections were single- or  
808 double-immunogold-labeled with antibodies and protein A coupled to 10 or 15 nm gold  
809 (CMC, UMC Utrecht, The Netherlands), as indicated in the legends to the figures.

810 Immunogold-labeled cryosections were observed under a FEI Tecnai 12 microscope  
811 equipped with a CCD (SiS 1kx1k keenView) camera.

### 812 **Quantifications**

813 For the quantification of the number of cristae junction in Epon sections, about 200  
814 mitochondria were analyzed in randomly selected cell profiles and cristae junctions  
815 were counted in each of the mitochondria profile and reported as number of  
816 cristae/mitochondria profile. All data are presented as mean  $\pm$ SEM of three  
817 experimental replicates.

818 For the quantification of ER-mitochondria contact sites in HRP-stained Epon  
819 sections, the total circumference of each mitochondria and the length of the multiple  
820 HRP-positive ER segments closely associated ( $<30$  nm) with them were measured by  
821 iTEM software (Olympus) on acquired micrographs of HeLa cells for each of 20-30 cell  
822 profiles, as indicated in the figure legends. Cells were randomly selected for analysis  
823 without prior knowledge of transfected plasmid or siRNA. All data are presented as  
824 mean (%)  $\pm$ SEM of three experimental replicates.

825 For the quantification of immunogold labeling on ultrathin cryosections, 150 gold  
826 particles were counted on acquired micrographs of randomly selected cell profiles at  
827 specific ranges of distance from CJ (0-50, 50-100, 100-150, 150-200 nm) in each of  
828 three experiments. All data are presented as mean (%)  $\pm$ SEM of three technical  
829 replicates.

830

### 831 ***In situ* proximity ligation assay (PLA)**

832 The protein-protein interactions in fixed HeLa cells were assessed using *in situ*  
833 PLA (Duolink<sup>®</sup>SIGMA) according with the manufacturer's instructions. Briefly, HeLa  
834 cells seeded on glass coverslips were incubated with MitoTracker Red (1  $\mu$ M in DMEM,

835 mitochondrial marker) for 30 min at 37°C or co-transfected with PHPLCd-RFP (plasma  
836 membrane marker) plus Mito-BFP (mitochondrial marker). Cells were thereafter fixed  
837 with 4% PFA for 30 minutes at room temperature and incubated with primary  
838 antibodies, monoclonal mouse anti-human ORP8 (1:150) polyclonal rabbit plus anti-  
839 human ORP5 (1:200, SIGMA), or monoclonal mouse anti-human ORP8 (1:150) plus  
840 polyclonal rabbit anti-human SAM50 (1:250, SIGMA), in blocking solution (1% BSA,  
841 w/v 0.01% saponin, w/v, in PBS) for 1h at room temperature. PLUS and MINUS PLA  
842 probes (anti-murine and anti-rabbit IgG antibodies conjugated with oligonucleotides,  
843 1:5 in blocking solution) were then incubated with the samples for 1h at 37°C.  
844 Coverslips were thereafter washed in 1x wash buffer A and incubated with ligation  
845 solution (5x Duolink<sup>®</sup> Ligation buffer 1:5, ligase 1:40 in high purity water) for 30 min at  
846 37°C. After the ligation step, cell samples were washed in 1x wash buffer A and  
847 incubated with the polymerase solution (5x Amplification buffer 1:5, polymerase 1:80  
848 in high purity water) for 1h40min at 37°C. Polymerase solution was washed out from  
849 the coverslips with 1x wash buffer B and 0.01x wash buffer B. Vectashield Mounting  
850 Medium with or without DAPI (Vector Laboratories) was used for mounting.

### 851 ***Quantification of PLA***

852 The number and the distance of PLA dots to mitochondria and to the plasma  
853 membrane were assessed using the Imaris software (v 9.3, Bitplane). Briefly,  
854 segmented 3D images (PLA foci identified as “spots”, mitochondria identified as  
855 “surfaces”, and plasma membrane represented as “cell” were generated from confocal  
856 Z-stack images and the shortest distance between each spot center and the nearest  
857 point of the surface or cell object was calculated based on a 3D distance map. Spots  
858 objects (PLA dots) with a distance smaller than 380nm from surfaces (mitochondria)  
859 and cell (plasma membrane) objects were considered at a close proximity of these

860 objects. The threshold of 380 nm was used as an estimation of the PLA reaction  
861 precision including both primary and secondary antibodies (30nm) plus half the FWHM  
862 of the PLA amplification signals (350nm).

863

#### 864 **Mass Spectrometry-lipidomic analysis**

865 700  $\mu$ l of homogenized cells were mixed with 800  $\mu$ l 1 N HCl:CH<sub>3</sub>OH 1:8 (v/v), 900  
866  $\mu$ l CHCl<sub>3</sub> and 200  $\mu$ g/ml of the antioxidant 2,6-di-tert-butyl-4-methylphenol (BHT;  
867 Sigma Aldrich). The organic fraction was evaporated using a Savant Speedvac  
868 spd111v (Thermo Fisher Scientific). Lipid pellets were reconstituted in running solution  
869 (CH<sub>3</sub>OH:CHCl<sub>3</sub>:NH<sub>4</sub>OH; 90:10:1.25; v/v/v). Phospholipid species were analyzed by  
870 electrospray ionization tandem mass spectrometry (ESI-MS/MS) on a hybrid triple  
871 quadrupole/linear ion trap mass spectrometer (4000 QTRAP system; Applied  
872 Biosystems SCIEX) equipped with a TriVersa NanoMate (Advion Biosciences) robotic  
873 nanosource. Phospholipid profiling was executed by (positive or negative) precursor  
874 ion or neutral loss scanning at a collision energy of 35 eV for neutral loss 141  
875 (phosphatidylethanolamine (PE)). Phospholipid quantification was performed by  
876 multiple reaction monitoring (MRM), the transitions being based on the neutral losses  
877 or the typical product ions as described above. The MRM dwell time was set to 100  
878 ms and typically the signal was averaged over 20 cycles. Lipid standards used were  
879 PE25:0 and PE43:6 (Avanti Polar Lipids). The data were corrected for isotope effects  
880 as described by (Liebisch, Lieser et al., 2004).

881

#### 882 **Lipid Transfer assay**

#### 883 ***ORP5 and ORP8 ORD domain purification***

884 Escherichia coli BL21DE3 RILP (Invitrogen) cells were transformed with plasmids  
885 encoding for GST tagged ORP5 or ORP8 ORD domains following the manufacturer's  
886 instruction. Bacteria were then grown overnight at 37°C and used to inoculate a large-  
887 scale volume (1L). When the OD<sub>600</sub> reached 0.4, cultures were cooled down and  
888 incubated at 18°C until they reached O<sub>D600</sub> = 0.65. Cells were induced by addition  
889 of isopropyl β-D-1-thiogalactopyranoside to a final concentration of 0.1 mM and  
890 incubated overnight at 18°C before harvesting. Cells were resuspended in 35 mL  
891 binding buffer (1X PBS, 1 mM EDTA, 1 mM DTT, Protease inhibitor) then 250 units of  
892 benzonase nuclease (Sigma) were added to the resuspension. Cells were lysed by  
893 sonication and the supernatant was recover after 20 min centrifugation at 184 000g  
894 and 4°C. Supernatant containing GST tagged proteins was incubated with 2 mL of  
895 Glutathione Sepharose 4 fast flow for 1 hour at 4°C under nutation. Beads were  
896 washed using a series of wash buffers: 1<sup>st</sup> (1X PBS, 1 mM EDTA, 1 mM DTT), 2<sup>nd</sup>  
897 HSP-removal buffer (50 mM Tris pH 7.5, 50 mM KCl, 20 mM MgCl<sub>2</sub>, 5 mM ATP) then  
898 cleavage buffer (50 mM Tris pH 7.5, 150 mM NaCl, 1 mM EDTA, 1 mM DTT). Cleavage  
899 of the GST tag was realized overnight at 4°C using Prescission protease. Untagged  
900 proteins were eluted with cleavage buffer, flash frozen and stored at -80°C until lipid  
901 transfer assay was performed.

## 902 **Lipids**

903 1-palmitoyl-2-oleoyl-sn-glycero-3-phosphocholine (POPC), 1,2-dioleoyl-sn-  
904 glycero-3-phosphoethanolamine-N-(cap biotiny) (Biotiny Cap PE), 1-palmitoyl-2-  
905 (dipyrrometheneboron difluoride)undecanoyl-sn-glycero-3-phosphoethanolamine  
906 (TopFluor-PE), 1-palmitoyl-2-(dipyrrometheneboron difluoride)undecanoyl-sn-glycero-  
907 3-phospho-L-serine (TopFluor-PS), 1-palmitoyl-2-(dipyrrometheneboron

908 difluoride)undecanoyl-sn-glycero-3-phosphocholine (TopFluor-PC) were purchased  
909 from Avanti Polar Lipids as chloroform solutions.

### 910 ***Liposome preparation***

911 1  $\mu\text{mol}$  of the appropriate lipid mixtures in chloroform solution was dried in a glass  
912 tube for 10 min under a gentle stream of argon, and then for 1 hour under vacuum.  
913 The dried lipid films were resuspended in 1 mL of buffer H (25 mM HEPES/KOH, pH  
914 7.7; 150 mM KCl; 10%(v/v) Glycerol) by vigorously vortexing for 30 min at room  
915 temperature. Unilamellar liposomes were produced by seven freeze-thaw cycles (30  
916 sec in liquid nitrogen followed by 5 min in a 37°C water bath) and extrusion (at least  
917 21 times) through a polycarbonate filter with 100 nm pore size (polycarbonate  
918 membranes from Avanti Polar Lipids). The liposomes were then stored on ice.

### 919 ***Lipid Transfer assay in vitro***

920 The lipid transfer assays were realized with liposomes prepared as described  
921 above. The donor liposomes contained 1% mol TopFluor lipids (-PS, -PC or -PE) and  
922 2% mol Biotinyl Cap PE. The acceptor liposomes contained only POPC. For each  
923 reaction, 25  $\mu\text{L}$  of streptavidin-coated magnetic beads (DynabeadsMyOne Streptavidin  
924 T1, Invitrogen) were washed in buffer H and mixed with 25  $\mu\text{L}$  of 1 mM donor  
925 liposomes. The mixture was incubated for 1 hour at 25°C with intermittent gentle  
926 mixing. Bead-bound donor liposomes were then washed, resuspended in 25  $\mu\text{L}$  and  
927 mixed with 25  $\mu\text{L}$  of 1 mM acceptor liposomes and 50  $\mu\text{L}$  of buffer H or protein (0.3  $\mu\text{M}$   
928 protein and 2.5  $\mu\text{M}$  TopFluor lipids in the reaction solution). The mixture was incubated  
929 at 37°C for 1 hour with intermittent gentle mixing. Supernatant containing acceptor  
930 liposomes was recovered after binding of bead-bound donor liposomes to a magnetic  
931 rack. TopFluor fluorescence of acceptor and donor liposomes was measured (after  
932 solubilization with 0.4% (w/v) n-dodecyl- $\beta$ -D-maltoside, DDM) in a SpectraMax M5



933 plate reader (Molecular Device) equilibrated to 30°C (excitation: 450 nm; emission:  
934 510 nm; cutoff: 475 nm; low gain). The percentage of lipids transferred from donor to  
935 acceptor liposomes was determined using the following formula:  
936  $100 \cdot F_{\text{acceptor}} / (F_{\text{acceptor}} + F_{\text{donor}})$ . To confirm that fluorescence was transferred to acceptor  
937 liposomes, a fraction of the reaction supernatant – which has not been solubilized with  
938 DDM – was floated on a Nycodenz density gradient. 50  $\mu$ L of supernatant was mixed  
939 with 100  $\mu$ L of buffer H and 150  $\mu$ L of Nycodenz 80% in buffer H. The solution was  
940 transferred to a 0.8 mL Ultra-Clear centrifuge tube (Beckman Coulter) and overlaid  
941 with 250  $\mu$ L of Nycodenz 30% in buffer H and 75  $\mu$ L of buffer H. The tubes were  
942 centrifuged in a SW 55 Ti rotor (Beckman Coulter) at 246,000 g for 4 hours at 4 °C. 50  
943  $\mu$ L were collected from the top of the gradient and the fluorescence was measured.

944

#### 945 **Radiometric assay for the conversion of PS to PE *in situ***

946 Hela cells were seeded on 6-well plates and transfected for 48 hours with the  
947 non-targeting, ORP5 or ORP8-specific siRNAs specified above by using  
948 Oligofectamine (Thermo Fisher Scientific). The cells were then washed and shifted  
949 into Hanks balanced salt solution (Gibco) supplemented with a serine-free MEM  
950 amino acid mixture and MEM vitamins (Gibco), followed by 18 hours labeling with 2  
951  $\mu$ l/well L-[<sup>3</sup>H(G)]serine (30.9 Ci/mmol, NET24800, Perkin-Elmer)(Fig. 1e). In parallel  
952 experiments (Fig. 1f) cells were starved in serum-free medium for 10 hours and then  
953 treated with 1mM  $\beta$ -chloro-L-alanine (SIGMA) for 2 hours or left in serum-free  
954 medium, followed by 1hr pulse with 15  $\mu$ Ci/ml of [<sup>3</sup>H(G)]serine and 12 hours chase in  
955 serum-free DMEM. After the labeling (Fig. 1e) or the chase (Fig. 1f), the cells were  
956 scraped into 0.9 ml 2% NaCl per well, a 0.1 ml aliquot was withdrawn for protein  
957 analysis with the BCA assay (Thermo Fisher Scientific), and, after adding 50 nmol of

958 unlabeled PS as carrier, the remaining 0.8 ml was subjected to lipid extraction by an  
959 acid modification of the Folch method (Kim, Song et al., 2017). After drying, the lipids  
960 were resolved in 50  $\mu$ l CHCl<sub>3</sub> and applied on Merck TLC Silica gel 60<sup>TM</sup> plates,  
961 followed by separation by using CHCl<sub>3</sub>-methanol-acetic acid-H<sub>2</sub>O (50:30:8:3.5) as  
962 solvent. The PS and PE spots identified from the mobility of standards run on the  
963 same plates were scraped into scintillation vials for analysis of [<sup>3</sup>H] radioactivity. The  
964 DPM values were corrected for total cell protein, and the ratio of [<sup>3</sup>H] in PE vs. PS  
965 calculated.

966

### 967 **Mitochondrial respiration assay**

968 Oxygen Consumption rate (OCR) was measured using the XF<sub>p</sub> Extracellular Flux  
969 Analyzer (Seahorse Bioscience Inc.). HeLa cells were seeded on a 6-well plate 3 days  
970 before the Seahorse experiment and knockdown of the proteins of interest was  
971 realized 2 days before. The day after the knockdown, HeLa cells transfected with Ctrl,  
972 ORP5, or ORP8 siRNAs were plated in a Seahorse XFp 8-mini wells microplate.  
973 20,000 HeLa cells were seeded in each well (except in the blank wells used for the  
974 background correction) in 180  $\mu$ l of culture medium, and incubated overnight at 37 °C  
975 in 5% CO<sub>2</sub>. One day after, the culture medium was replaced with 180  $\mu$ l of XF DMEM  
976 Medium Solution pH 7.4 and then the 8-mini wells microplate was moved in a 37°C  
977 non-CO<sub>2</sub> incubator before measurement. OCR was determined before drug additions  
978 and after addition of Oligomycin (1.5  $\mu$ M), Carbonyl cyanide 4-(trifluoromethoxy)  
979 phenylhydrazone (FCCP, 0.5  $\mu$ M), and Rotenone/Antimycin A (0.5  $\mu$ M) (purchased  
980 from Agilent). After each assay, all the raw OCR data were analyzed using WAVE  
981 software.

982

983 **Statistical Analysis**

984 Statistical analysis was performed with Microsoft Excel or GraphPad Prism 9.0.

985 The data were presented as mean  $\pm$  standard error of the mean (SEM). The *n*,

986 indicated in the figures and figure legends, represent the total number of cells

987 analyzed in three or more biological replicates, as stated in the figures legend.

988 Statistical significance of two data sets were determined by unpaired student's *t*-test,

989 with \*  $p < 0.05$ , \*\*\*  $p < 0.01$ , \*\*\*\*  $p < 0.001$  and \*\*\*\*\*  $p < 0.0001$ .

990

991 **ACKNOWLEDGEMENTS**

992 We thank Dr V. Kozjak-Pavlovic and P. Somerharju for kindly sharing reagents

993 and advices with us. We also thank Dr. R. Legouis, Dr. Emmanuel Culetto for

994 discussion and for critically reading the manuscript; Claire Boulogne, Sandrine Lécart

995 and Remi Le Borgne for help and consultation with microscopy experiments; Valentin

996 Guyard, Blandine Bourigault, Riikka Kosonen and Liisa Arala for technical assistance.

997 The present work has benefited from Imagerie-Gif core facility supported by l'Agence

998 Nationale de la Recherche (ANR-11-EQPX-0029/Morphoscope, ANR-10-INBS-

999 04/FranceBioImaging; ANR-11-IDEX-0003-02/ Saclay Plant Sciences). For the

1000 Immuno-EM and HRP-KDEL EM analysis/quantifications we acknowledge the

1001 ImagoSeine facility, member of the France BioImaging infrastructure supported by

1002 grant ANR-10-INBS-04 from the French National Research Agency. We also thank

1003 Jean-Michel Camadro and Thibault Leger (IJM proteomics platform) for proteomics

1004 analysis. This work was supported by the ANR Jeune Chercheur (ANR0015TD), the

1005 ATIP-Avenir Program, the FSER (FRM n°206548) and the FVA (eOTP:669122 LS

1006 212527) to F.G.; the Academy of Finland (grants 285223 and 322647), the Sigrid

1007 Juselius Foundation, the Finnish Foundation for Cardiovascular Research and the

1008 Magnus Ehrnrooth Foundation to V.M.O.; the “Association Française contre les  
1009 Myopathies” (AFM Research grant 20123) and the ITMO-Inserm Plan Cancer 2014-  
1010 2019 to D.T.

1011

## 1012 **AUTHOR CONTRIBUTIONS**

1013 FG conceived and supervised the work. VO designed and supervised the  
1014 radiometric assays for PS-to-PE conversion and the expression analysis by RT-PCR.  
1015 DT designed and supervised the *in vitro* lipid transfer assays. LR performed and  
1016 analyzed the cell experiments including cell imaging and Seahorse analysis. VC  
1017 performed and analyzed the cell experiments including immunofluorescence for  
1018 endogenous proteins and Duolink. LR, AH, and FG performed and analyzed the EM  
1019 experiments. CS participated to the setting up of the Seahorse experiments. CS, AH  
1020 and DT performed and analyzed the *in vitro* lipid transfer assays. AA, EJ and AK  
1021 performed and analyzed the radiometric assays for PS-to-PE conversion. EM, JD and  
1022 JS performed MS-lipidomic analysis. RLB provided tools and techniques for Duolink  
1023 imaging analysis. JN and NEK provided technical help in western blot analysis and  
1024 generated some of the constructs for mammalian cell expression. LR, VC and FG  
1025 wrote the manuscript and all authors commented on the manuscript.

1026

## 1027 **CONFLICT OF INTERESTS**

1028 The authors declare that they have no competing interests.

1029

## 1030 **DATA AVAILABILITY SECTION**

1031 This study includes no data deposited in external repositories.

1032

1033

## 1034 **REFERENCES**

- 1035 Aaltonen MJ, Friedman JR, Osman C, Salin B, di Rago JP, Nunnari J, Langer T, Tatsuta T  
1036 (2016) MICOS and phospholipid transfer by Ups2-Mdm35 organize membrane lipid  
1037 synthesis in mitochondria. *The Journal of cell biology* 213: 525-34
- 1038 Chen H, Born E, Mathur SN, Field FJ (1993) Cholesterol and sphingomyelin syntheses are  
1039 regulated independently in cultured human intestinal cells, CaCo-2: role of membrane  
1040 cholesterol and sphingomyelin content. *J Lipid Res* 34: 2159-67
- 1041 Chung J, Torta F, Masai K, Lucast L, Czapla H, Tanner LB, Narayanaswamy P, Wenk MR,  
1042 Nakatsu F, De Camilli P (2015) INTRACELLULAR TRANSPORT. PI4P/phosphatidylserine  
1043 countertransport at ORP5- and ORP8-mediated ER-plasma membrane contacts. *Science*  
1044 349: 428-32
- 1045 Ding C, Wu Z, Huang L, Wang Y, Xue J, Chen S, Deng Z, Wang L, Song Z, Chen S (2015)  
1046 Mitofilin and CHCHD6 physically interact with Sam50 to sustain cristae structure. *Sci*  
1047 *Rep* 5: 16064
- 1048 Friedman JR, Mourier A, Yamada J, McCaffery JM, Nunnari J (2015) MICOS coordinates  
1049 with respiratory complexes and lipids to establish mitochondrial inner membrane  
1050 architecture. *eLife* 4
- 1051 Gallo A, Danglot L, Giordano F, Hewlett B, Binz T, Vannier C, Galli T (2020) Role of the  
1052 Sec22b-E-Syt complex in neurite growth and ramification. *Journal of cell science* 133
- 1053 Galmes R, Houcine A, van Vliet AR, Agostinis P, Jackson CL, Giordano F (2016)  
1054 ORP5/ORP8 localize to endoplasmic reticulum-mitochondria contacts and are involved  
1055 in mitochondrial function. *EMBO reports* 17: 800-10
- 1056 Ghai R, Du X, Wang H, Dong J, Ferguson C, Brown AJ, Parton RG, Wu JW, Yang H (2017)  
1057 ORP5 and ORP8 bind phosphatidylinositol-4, 5-bisphosphate (PtdIns(4,5)P<sub>2</sub>) and  
1058 regulate its level at the plasma membrane. *Nature communications* 8: 757
- 1059 Giordano F (2018) Non-vesicular lipid trafficking at the endoplasmic reticulum-  
1060 mitochondria interface. *Biochemical Society transactions* 46: 437-452
- 1061 Giordano F, Saheki Y, Idevall-Hagren O, Colombo SF, Pirruccello M, Milosevic I, Gracheva  
1062 EO, Bagriantsev SN, Borgese N, De Camilli P (2013) PI(4,5)P<sub>2</sub>-Dependent and Ca<sup>2+</sup>-  
1063 Regulated ER-PM Interactions Mediated by the Extended Synaptotagmins. *Cell* 153:  
1064 1494-509
- 1065 Guarani V, McNeill EM, Paulo JA, Huttlin EL, Frohlich F, Gygi SP, Van Vactor D, Harper JW  
1066 (2015) QIL1 is a novel mitochondrial protein required for MICOS complex stability and  
1067 cristae morphology. *eLife* 4
- 1068 Hanada K, Nishijima M, Kiso M, Hasegawa A, Fujita S, Ogawa T, Akamatsu Y (1992)  
1069 Sphingolipids are essential for the growth of Chinese hamster ovary cells. Restoration of  
1070 the growth of a mutant defective in sphingoid base biosynthesis by exogenous  
1071 sphingolipids. *The Journal of biological chemistry* 267: 23527-33
- 1072 Harner M, Korner C, Walther D, Mokranjac D, Kaesmacher J, Welsch U, Griffith J, Mann M,  
1073 Reggiori F, Neupert W (2011) The mitochondrial contact site complex, a determinant of  
1074 mitochondrial architecture. *The EMBO journal* 30: 4356-70
- 1075 Heikinheimo L, Somerharju P (1998) Preferential decarboxylation of hydrophilic  
1076 phosphatidylserine species in cultured cells. Implications on the mechanism of transport  
1077 to mitochondria and cellular aminophospholipid species compositions. *The Journal of*  
1078 *biological chemistry* 273: 3327-35
- 1079 Herrera-Cruz MS, Simmen T (2017) Of yeast, mice and men: MAMs come in two flavors.  
1080 *Biol Direct* 12: 3
- 1081 Hirabayashi Y, Kwon SK, Paek H, Pernice WM, Paul MA, Lee J, Erfani P, Raczkowski A,  
1082 Petrey DS, Pon LA, Polleux F (2017) ER-mitochondria tethering by PDZD8 regulates  
1083 Ca<sup>2+</sup> dynamics in mammalian neurons. *Science* 358: 623-630

1084 Hohl AIC, Lindau C, Wirth C, Qiu J, Stroud DA, Kutik S, Guiard B, Hunte C, Becker T,  
1085 Pfanner N, Wiedemann N (2018) Membrane protein insertion through a mitochondrial  
1086 beta-barrel gate. *Science* 359  
1087 Huynen MA, Muhlmeister M, Gotthardt K, Guerrero-Castillo S, Brandt U (2016) Evolution  
1088 and structural organization of the mitochondrial contact site (MICOS) complex and the  
1089 mitochondrial intermembrane space bridging (MIB) complex. *Biochimica et biophysica*  
1090 *acta* 1863: 91-101  
1091 John GB, Shang Y, Li L, Renken C, Mannella CA, Selker JM, Rangell L, Bennett MJ, Zha J  
1092 (2005) The mitochondrial inner membrane protein mitofilin controls cristae  
1093 morphology. *Molecular biology of the cell* 16: 1543-54  
1094 Joshi AS, Thompson MN, Fei N, Huttemann M, Greenberg ML (2012) Cardiolipin and  
1095 mitochondrial phosphatidylethanolamine have overlapping functions in mitochondrial  
1096 fusion in *Saccharomyces cerevisiae*. *The Journal of biological chemistry* 287: 17589-97  
1097 Kim SH, Song HE, Kim SJ, Woo DC, Chang S, Choi WG, Kim MJ, Back SH, Yoo HJ (2017)  
1098 Quantitative structural characterization of phosphatidylinositol phosphates from  
1099 biological samples. *J Lipid Res* 58: 469-478  
1100 Kopec KO, Alva V, Lupas AN (2010) Homology of SMP domains to the TULIP superfamily  
1101 of lipid-binding proteins provides a structural basis for lipid exchange between ER and  
1102 mitochondria. *Bioinformatics* 26: 1927-31  
1103 Kornmann B, Currie E, Collins SR, Schuldiner M, Nunnari J, Weissman JS, Walter P (2009)  
1104 An ER-mitochondria tethering complex revealed by a synthetic biology screen. *Science*  
1105 325: 477-81  
1106 Kozjak V, Wiedemann N, Milenkovic D, Lohaus C, Meyer HE, Guiard B, Meisinger C,  
1107 Pfanner N (2003) An essential role of Sam50 in the protein sorting and assembly  
1108 machinery of the mitochondrial outer membrane. *The Journal of biological chemistry*  
1109 278: 48520-3  
1110 Kozjak-Pavlovic V, Ross K, Benlasfer N, Kimmig S, Karlas A, Rudel T (2007) Conserved  
1111 roles of Sam50 and metaxins in VDAC biogenesis. *EMBO reports* 8: 576-82  
1112 Kumar N, Leonzino M, Hancock-Cerutti W, Horenkamp FA, Li P, Lees JA, Wheeler H,  
1113 Reinisch KM, De Camilli P (2018) VPS13A and VPS13C are lipid transport proteins  
1114 differentially localized at ER contact sites. *The Journal of cell biology* 217: 3625-3639  
1115 Lang A, John Peter AT, Kornmann B (2015) ER-mitochondria contact sites in yeast:  
1116 beyond the myths of ERMES. *Current opinion in cell biology* 35: 7-12  
1117 Liebisch G, Lieser B, Rathenberg J, Drobnik W, Schmitz G (2004) High-throughput  
1118 quantification of phosphatidylcholine and sphingomyelin by electrospray ionization  
1119 tandem mass spectrometry coupled with isotope correction algorithm. *Biochimica et*  
1120 *biophysica acta* 1686: 108-17  
1121 Maeda K, Anand K, Chiapparino A, Kumar A, Poletto M, Kaksonen M, Gavin AC (2013)  
1122 Interactome map uncovers phosphatidylserine transport by oxysterol-binding proteins.  
1123 *Nature* 501: 257-61  
1124 Ott C, Dorsch E, Fraunholz M, Straub S, Kozjak-Pavlovic V (2015) Detailed analysis of the  
1125 human mitochondrial contact site complex indicate a hierarchy of subunits. *PloS one* 10:  
1126 e0120213  
1127 Reinisch KM, De Camilli P (2016) SMP-domain proteins at membrane contact sites:  
1128 Structure and function. *Biochimica et biophysica acta* 1861: 924-927  
1129 Schikorski T, Young SM, Jr., Hu Y (2007) Horseradish peroxidase cDNA as a marker for  
1130 electron microscopy in neurons. *Journal of neuroscience methods* 165: 210-5  
1131 Scorrano L, De Matteis MA, Emr S, Giordano F, Hajnoczky G, Kornmann B, Lackner LL,  
1132 Levine TP, Pellegrini L, Reinisch K, Rizzuto R, Simmen T, Stenmark H, Ungermann C,



- 1133 Schuldiner M (2019) Coming together to define membrane contact sites. *Nature*  
1134 *communications* 10: 1287
- 1135 Shiao YJ, Lupo G, Vance JE (1995) Evidence that phosphatidylserine is imported into  
1136 mitochondria via a mitochondria-associated membrane and that the majority of  
1137 mitochondrial phosphatidylethanolamine is derived from decarboxylation of  
1138 phosphatidylserine. *The Journal of biological chemistry* 270: 11190-8
- 1139 Shibata Y, Voss C, Rist JM, Hu J, Rapoport TA, Prinz WA, Voeltz GK (2008) The reticulon  
1140 and DP1/Yop1p proteins form immobile oligomers in the tubular endoplasmic  
1141 reticulum. *The Journal of biological chemistry* 283: 18892-904
- 1142 Slot JW, Geuze HJ (2007) Cryosectioning and immunolabeling. *Nature protocols* 2: 2480-  
1143 91
- 1144 Steenbergen R, Nanowski TS, Beigneux A, Kulinski A, Young SG, Vance JE (2005)  
1145 Disruption of the phosphatidylserine decarboxylase gene in mice causes embryonic  
1146 lethality and mitochondrial defects. *The Journal of biological chemistry* 280: 40032-40
- 1147 Stoica R, De Vos KJ, Paillusson S, Mueller S, Sancho RM, Lau KF, Vizcay-Barrena G, Lin  
1148 WL, Xu YF, Lewis J, Dickson DW, Petrucelli L, Mitchell JC, Shaw CE, Miller CC (2014) ER-  
1149 mitochondria associations are regulated by the VAPB-PTPIP51 interaction and are  
1150 disrupted by ALS/FTD-associated TDP-43. *Nature communications* 5: 3996
- 1151 Tamura Y, Endo T (2017) Role of Intra- and Inter-mitochondrial Membrane Contact  
1152 Sites in Yeast Phospholipid Biogenesis. *Advances in experimental medicine and biology*  
1153 997: 121-133
- 1154 Tasseva G, Bai HD, Davidescu M, Haromy A, Michelakis E, Vance JE (2013)  
1155 Phosphatidylethanolamine deficiency in Mammalian mitochondria impairs oxidative  
1156 phosphorylation and alters mitochondrial morphology. *The Journal of biological*  
1157 *chemistry* 288: 4158-73
- 1158 Tatsuta T, Scharwey M, Langer T (2014) Mitochondrial lipid trafficking. *Trends in cell*  
1159 *biology* 24: 44-52
- 1160 Vance JE (1990) Phospholipid synthesis in a membrane fraction associated with  
1161 mitochondria. *The Journal of biological chemistry* 265: 7248-56
- 1162 Vance JE (2014) MAM (mitochondria-associated membranes) in mammalian cells: lipids  
1163 and beyond. *Biochimica et biophysica acta* 1841: 595-609
- 1164 Vance JE, Tasseva G (2013) Formation and function of phosphatidylserine and  
1165 phosphatidylethanolamine in mammalian cells. *Biochimica et biophysica acta* 1831:  
1166 543-54
- 1167 Wang H, Ma Q, Qi Y, Dong J, Du X, Rae J, Wang J, Wu WF, Brown AJ, Parton RG, Wu JW,  
1168 Yang H (2019) ORP2 Delivers Cholesterol to the Plasma Membrane in Exchange for  
1169 Phosphatidylinositol 4, 5-Bisphosphate (PI(4,5)P2). *Mol Cell* 73: 458-473 e7
- 1170 Wideman JG (2015) The ubiquitous and ancient ER membrane protein complex (EMC):  
1171 tether or not? *F1000Res* 4: 624
- 1172 Wideman JG, Balacco DL, Fieblinger T, Richards TA (2018) PDZD8 is not the 'functional  
1173 ortholog' of Mmm1, it is a paralog. *F1000Res* 7: 1088
- 1174 Wollweber F, von der Malsburg K, van der Laan M (2017) Mitochondrial contact site and  
1175 cristae organizing system: A central player in membrane shaping and crosstalk.  
1176 *Biochimica et biophysica acta* 1864: 1481-1489
- 1177 Yeo HK, Park TH, Kim HY, Jang H, Lee J, Hwang GS, Ryu SE, Park SH, Song HK, Ban HS,  
1178 Yoon HJ, Lee BI (2021) Phospholipid transfer function of PTPIP51 at mitochondria-  
1179 associated ER membranes. *EMBO reports* 22: e51323
- 1180



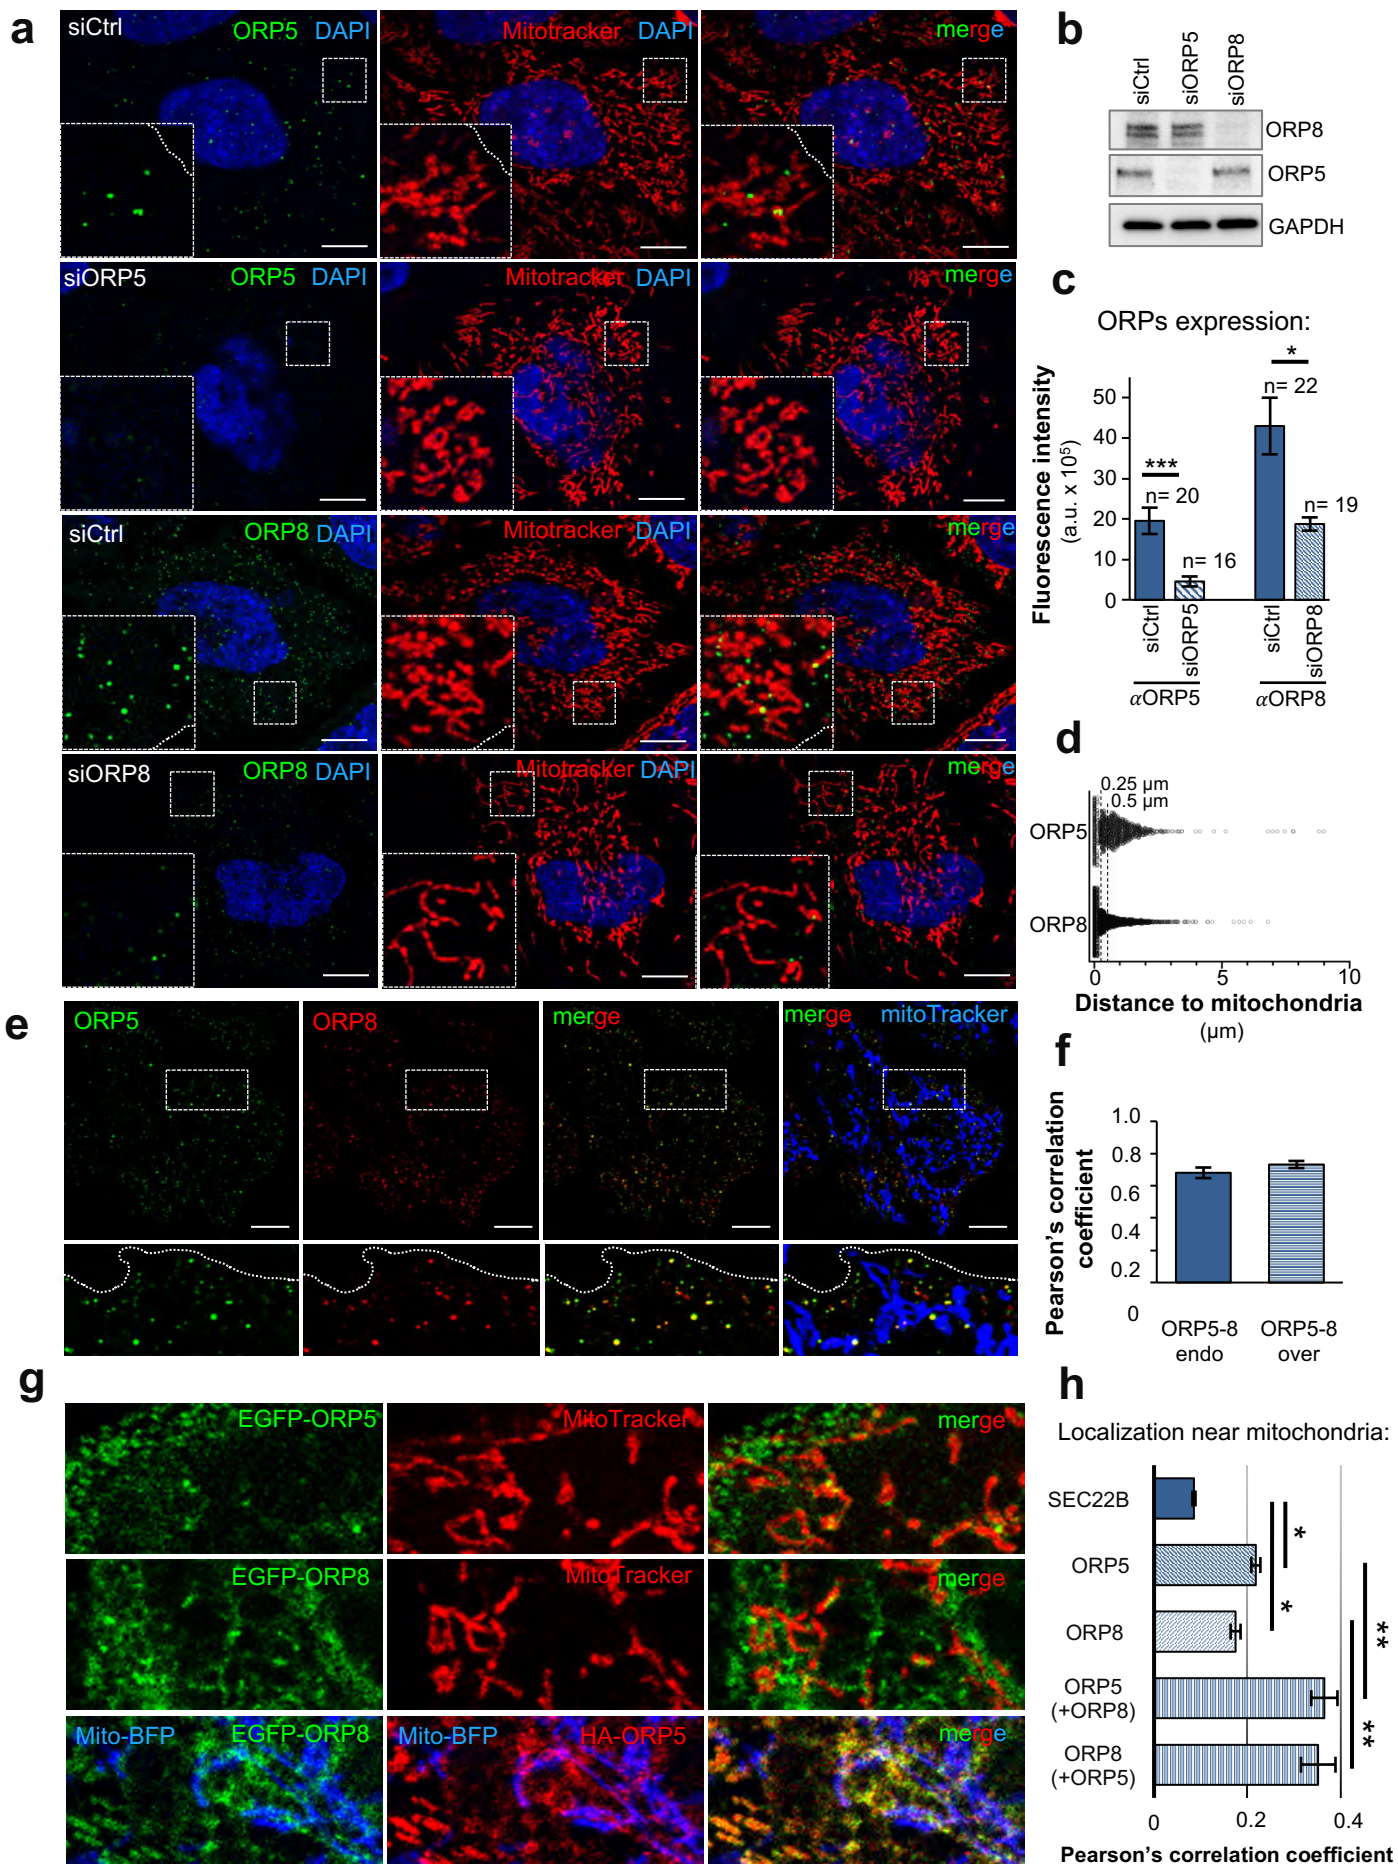

**Figure 1**

**Figure 1. Endogenous and co-overexpressed ORP5 and ORP8 co-localize at ER-mitochondria contact sites.** (a) Confocal images of Ctrl, ORP5 and ORP8 knockdown HeLa cells were immunostained using anti-ORP5 or ORP8 antibodies (green), and treated with MitoTracker to label mitochondria (red) and DAPI to stain the nuclei (blue). Images are presented as individual layers. Insets show magnifications of the boxed regions. Note the close association of endogenous ORP5 and ORP8 to mitochondria. Scale bar, 10  $\mu$ m. (b) WB analysis showing ORP5, ORP8 and GAPDH levels in protein lysates from Ctrl, ORP5 and ORP8 knockdown HeLa cells. (c) Quantification of ORP5 and ORP8 fluorescent intensity in Ctrl, ORP5 and ORP8 knockdown cells. Mean of fluorescent intensities in arbitrary units (a.u.  $\times 10^5$ ). Error bars denote  $\pm$  standard error of the mean (SEM). Number of cells given above bars. Statistical analysis: P values were determined by unpaired student's *t*-test, \*P<0.05, \*\*\*P<0.001. (d) Distribution of ORP5 and ORP8 IF staining (spots) in relation to their distance (in  $\mu$ m) to mitochondria indicating that part of the endogenous ORP5 and ORP8 in the cell is detected in close proximity to mitochondria (<0.5  $\mu$ m). (e) Confocal images of a HeLa cell immunostained using anti-ORP5 (green) or ORP8 (red) antibodies and MitoTracker (blue). Images are presented as individual layers. Insets show magnifications of the boxed regions. Scale bar, 10  $\mu$ m. (f) Quantification of the co-localization (Pearson's factor) of ORP5-ORP8 in endogenous (ORP5-8 end) and co-overexpression (ORP5-8 over) conditions. Bars indicate mean values  $\pm$  SEM. Number of cell analyzed: ORP5-8 end (n=15), ORP5-8 over (n=14). (g) Confocal micrograph of a region of HeLa cell (zoomed from Fig EV1a) transfected with EGFP-ORP5 (green), EGFP-ORP8 (green) or EGFP-ORP8 (green) + HA-ORP5 (anti-HA, red), and with Mito-BFP (blue). (h) Quantifications of the association to mitochondria (Pearson's factor) of the indicated EGFP-tagged constructs. Bars indicate mean values  $\pm$  SEM of three independent experiments with 10 cells for sample analyzed in each experiment (n=30). Statistical analysis: unpaired Student's *t*-test comparing EGFP-ORP5 (ORP5) or EGFP-ORP8 (ORP8) to EGFP-Sec22b (SEC22b) and HA-ORP5 (+EGFP-ORP8) or EGFP-ORP8 (+HA-ORP5) to EGFP-ORP5 or EGFP-ORP8, respectively. \*P<0.05, \*\*P<0.01.



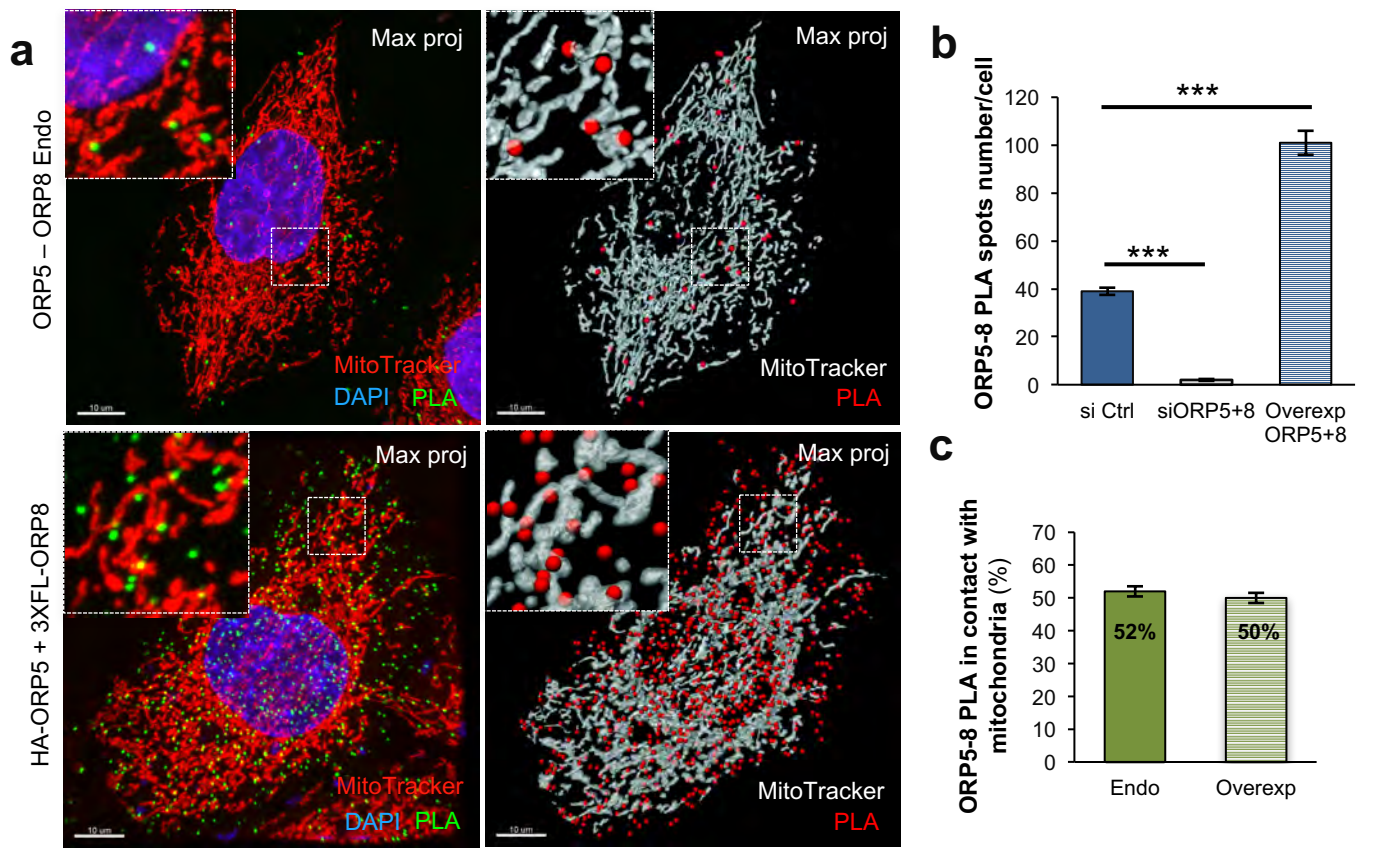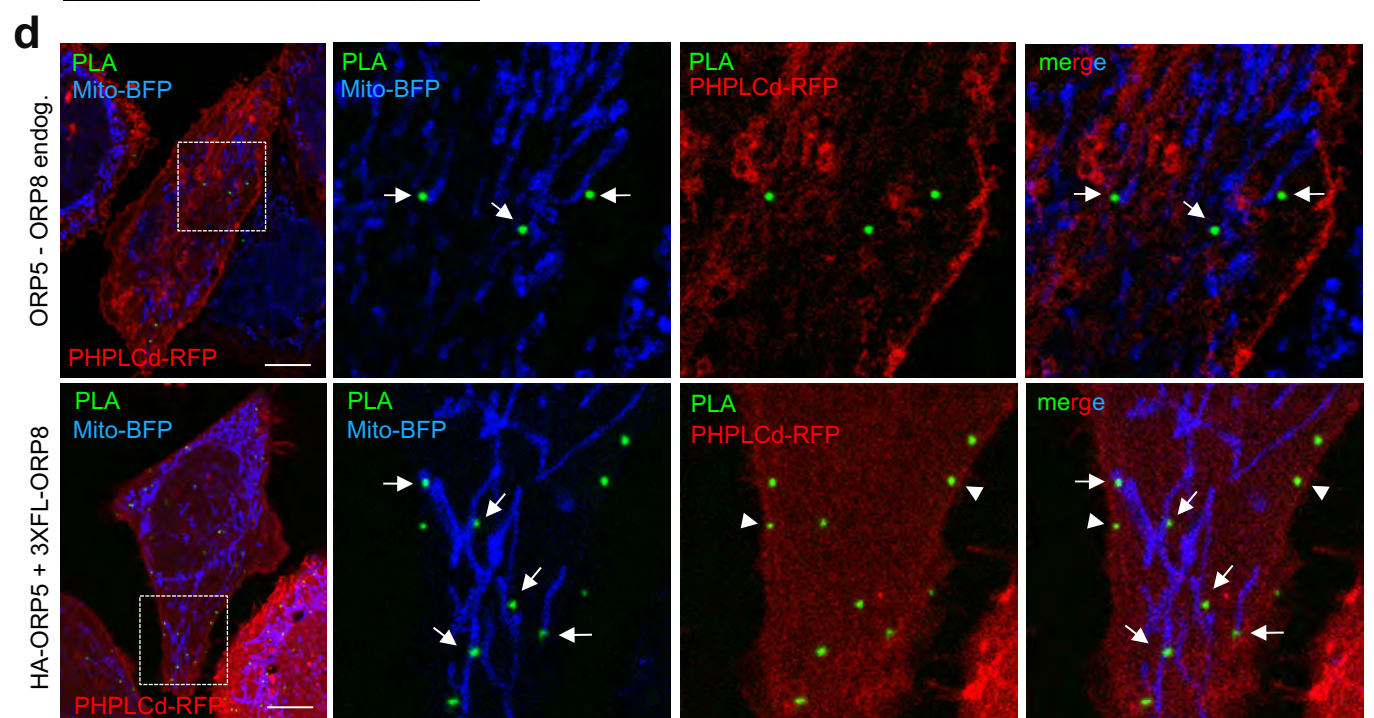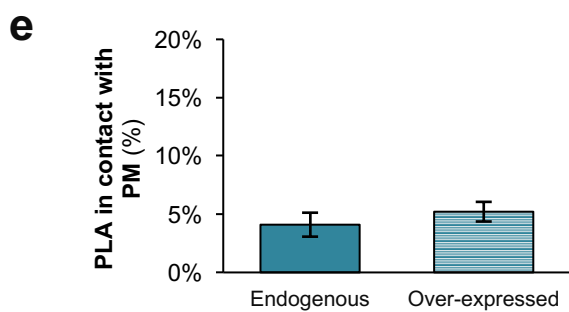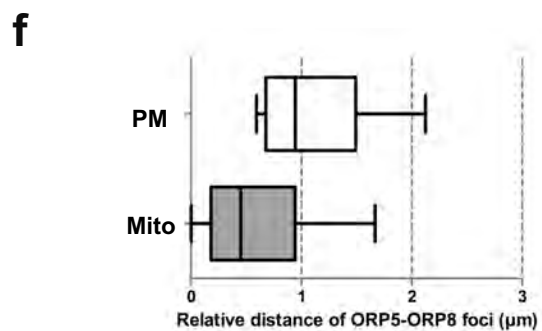

**Figure 2**

**Figure 2. The main localization of the endogenous ORP5-8 complex is ER-mitochondria contact sites.** (a) Representative confocal images of ORP5-ORP8 interaction in HeLa cells detected by Duolink PLA (green spots) in endogenous (ORP5-ORP8 Endo) and overexpressing (HA-ORP5 + 3xFL-ORP8) conditions, and their respective 3D representation by Imaris. Images are presented as maximum projection of all layers. Insets show magnifications of the boxed regions. Scale bar, 10  $\mu$ m. (b) Quantification of the number of ORP5-ORP8 PLA interactions in Control (siCtrl, n=39 cells), ORP5 and ORP8 knockdown (siORP5+8, n=38 cells), and in overexpression of ORP5 and ORP8 (Ovrexpr ORP5+8, n=35 cells), showing that the downregulation or the upregulation of both ORP5 and ORP8, respectively, reduces and increases the number of interaction established between these two proteins. Statistical analysis: P values were determined by unpaired student's *t*-test, \*\*\*P<0,001. (c) Quantification of ORP5-ORP8 PLA interaction localized to ER-Mitochondria contact sites in control (Endo, n= 33) and HeLa cells overexpressing (HA-ORP5 + 3xFL-ORP8, n=27 cells) showing that about 50% of ORP5-ORP8 interactions occurs at MAM. (d) Representative confocal images of ORP5-ORP8 PLA interaction (green spots) detected in HeLa cells overexpressing PHPLCd-RFP, Mito-BFP (ORP5-ORP8 Endo), or in HeLa cells overexpressing PHPLC $\delta$ -RFP, Mito-BFP, ORP5 and ORP8 (HA-ORP5 + 3xFL-ORP8). Images are presented as individual layers. Scale bar, 10  $\mu$ m. (e) Quantification of ORP5-ORP8 PLA signal localized to ER-plasma membrane contact sites indicate that about 5% of the total ORP5-ORP8 interactions occurs to these subdomains of the ER membranes, in both control (Endogenous, n=6 cells) and HeLa cells overexpressing ORP5 and ORP8 (Overexpressed, n=14 cells). (f) Box plot of ORP5-ORP8 endogenous PLA spots distance (in  $\mu$ m) to mitochondria and plasma membrane (box around median value, whiskers 10%-90%) evidencing that the majority of ORP5-ORP8 interactions were detected in a close proximity to mitochondria (<0.38  $\mu$ m) and distant from the plasma membrane ( $\geq$ 0.38  $\mu$ m).

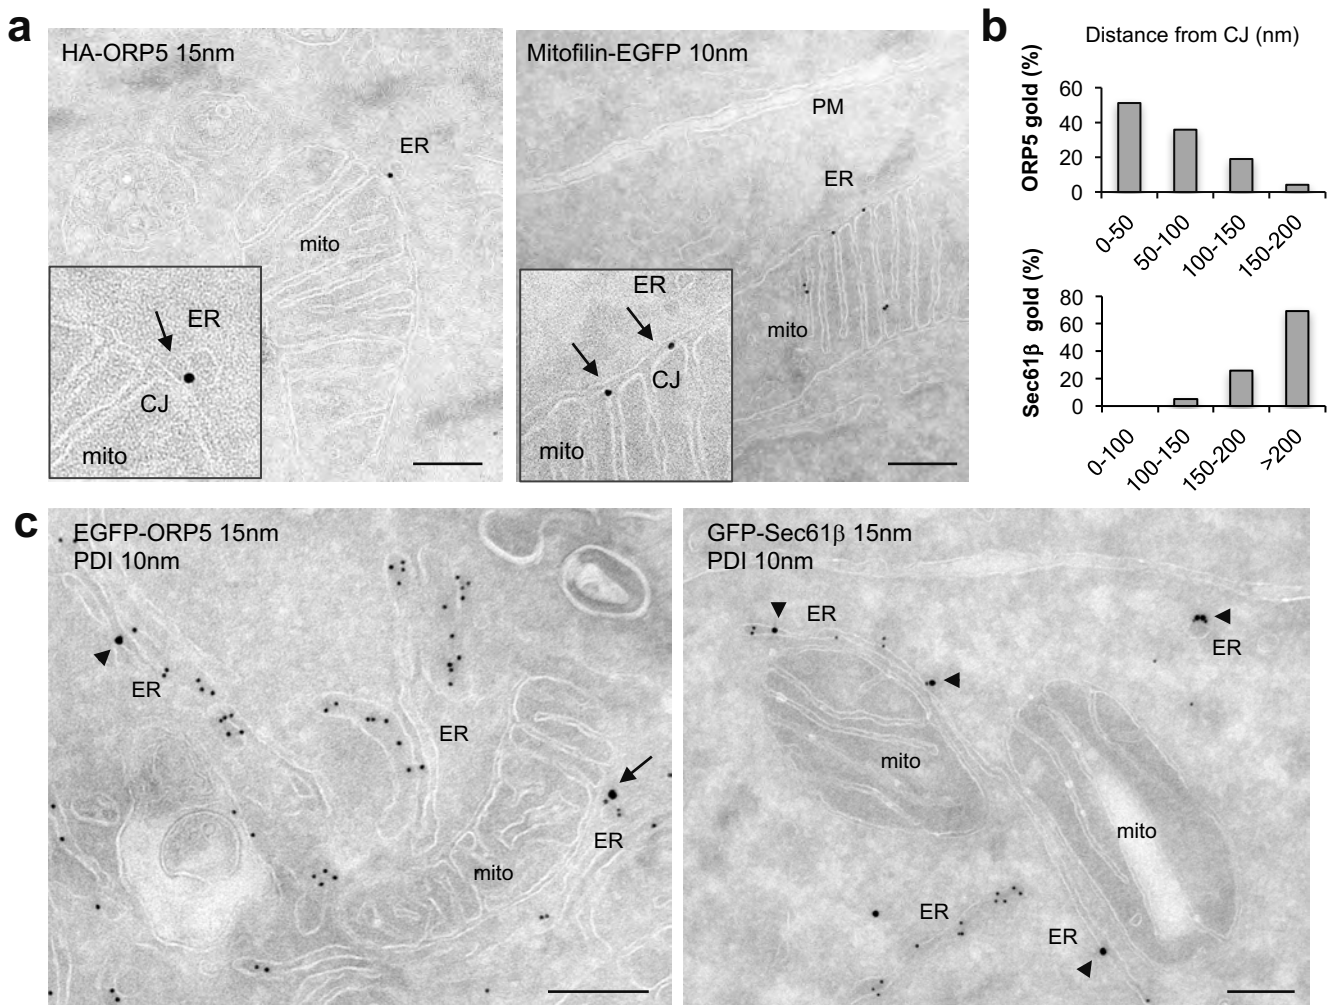

**Figure 3. ORP5 localizes at ER-mitochondria contact sites near cristae junctions (CJ).**

(a) Electron micrographs of ultrathin cryosections of HeLa cells transfected with HA-ORP5 or Mitofilin-EGFP and immunogold stained with anti-HA or anti-GFP (10 or 15 nm gold), showing ORP5 localization at ER-mitochondria contacts in close proximity to CJ (arrow) and the localization of the MICOS complex (Mitofilin) at CJ (arrows). Scale bar 250 nm. (b) Quantification of the proximity of HA-ORP5 and EGFP-Sec61 $\beta$  gold particles to the CJ. Results are presented as the percentage of ORP5 or Sec61 $\beta$  gold particles at specific ranges of distance (in nm) from CJ. 150 gold particles were counted on randomly selected cell profiles in each sample. (c) Electron micrographs of ultrathin cryosections of HeLa cells transfected with EGFP-ORP5 or GFP-Sec61 $\beta$  and immunogold labeled with anti-GFP (15 nm gold) and anti-PDI (10nm gold). Note ORP5 localization at ER-mitochondria contacts near CJ (arrow) and Sec61 $\beta$  localization to ER membranes not in contact with the mitochondria membranes (arrowheads). Scale bar 250 nm.

## Figure 3



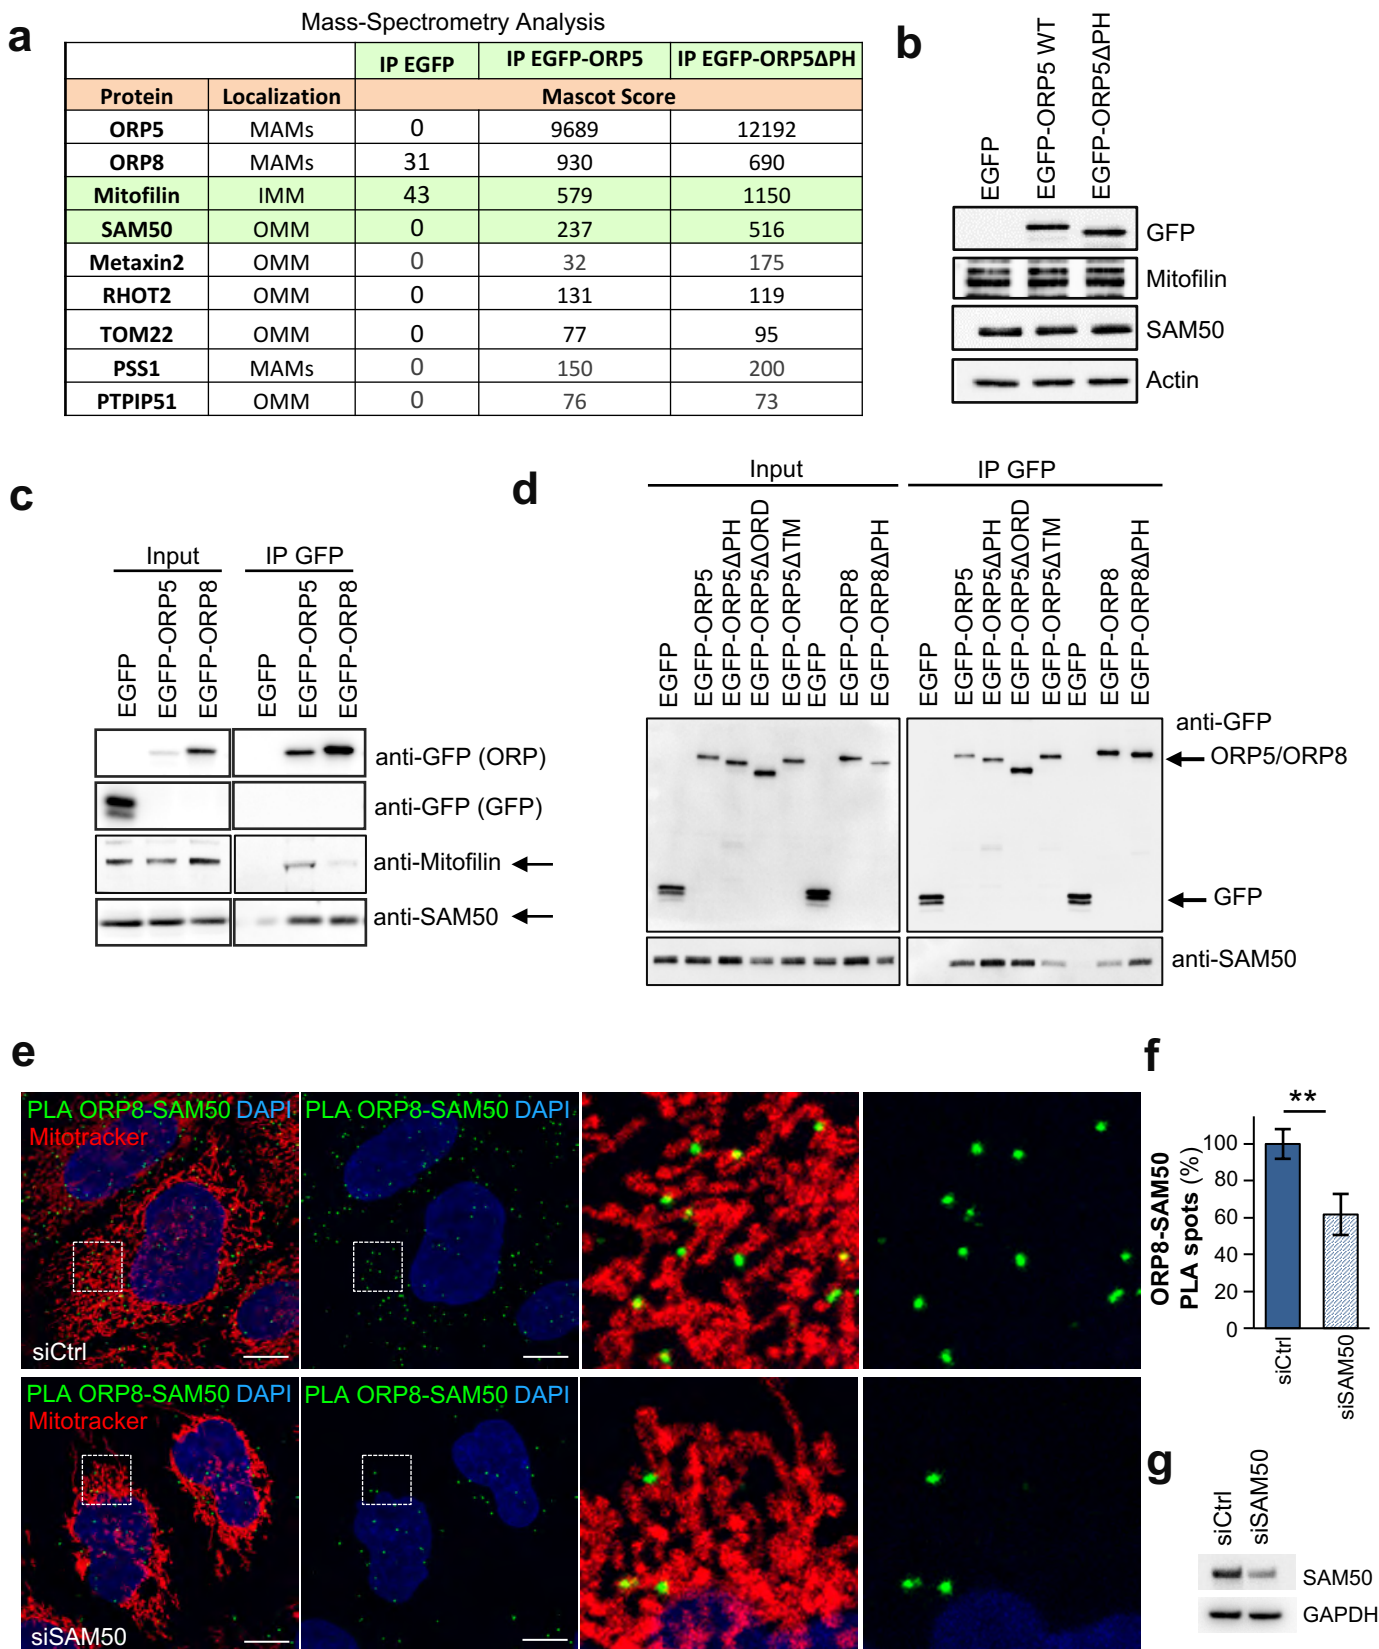

**Figure 4**

**Figure 4. ORP5 and ORP8 interact with the MIB/MICOS complex at ER-mitochondria contacts.** (a) Identification of mitochondrial proteins associated to mitochondrial outer or inner membranes (OMM, IMM) that interact with EGFP-tagged ORP5 constructs by mass spectrometry. Note the presence of some proteins of the MIB complex: Mitofilin, SAM50 and Metaxin2 and of their interacting partner RHOT2. Interaction scores (Mascot scores) of Mitofilin, SAM50 and Metaxin2 with the EGFP-ORP5 $\Delta$ PH construct are stronger than with EGFP-ORP5. (b) WB analysis showing GFP (EGFP-tagged constructs), Mitofilin, SAM50 and Actin levels in protein lysates from HeLa cells transfected with either EGFP (Control) or with EGFP-ORP5 or EGFP-ORP5 $\Delta$ PH constructs. (c) EGFP-ORP5, EGFP-ORP8 or EGFP alone were transfected in HeLa cells then immuno-precipitated from lysates and analyzed by western blot using antibodies against GFP (for ORP5 or ORP8), Mitofilin or SAM50. (d) EGFP-ORP5, EGFP-ORP5 $\Delta$ PH, EGFP-ORP5 $\Delta$ ORD, EGFP-ORP5 $\Delta$ TM, EGFP-ORP8, EGFP-ORP8 $\Delta$ PH or EGFP alone were transfected in HeLa cells then immuno-precipitated from lysates and analyzed by western blot using antibodies against GFP (for ORP5 or ORP8) or against SAM50. (e) Confocal images of Ctrl (siCtrl) and SAM50 (siSAM50) knockdown HeLa cells showing endogenous interaction of ORP8-SAM50 by Duolink PLA (green) at MAMs. Mitochondria are labeled by MitoTracker (red) and nuclei by DAPI (blue). Images are presented as maximum projection of all layers. Insets show magnifications of the boxed regions. Scale bar, 10  $\mu$ m. (f) Quantification of ORP8-SAM50 PLA signals in Control and SAM50 knockdown HeLa cells, showing the reduction of about 50% of ORP8-SAM50 PLA in SAM50 knockdown cells as compared to control. Bars indicate mean values  $\pm$ SEM. Number of cell analysed: siCtrl (n=30), siSAM50 (22) Statistical analysis: P values were determined by unpaired student's t-test, \*\*P<0.01. (g) WB analysis showing SAM50 and GAPDH levels in protein lysates from siCtrl and siSAM50 cells.



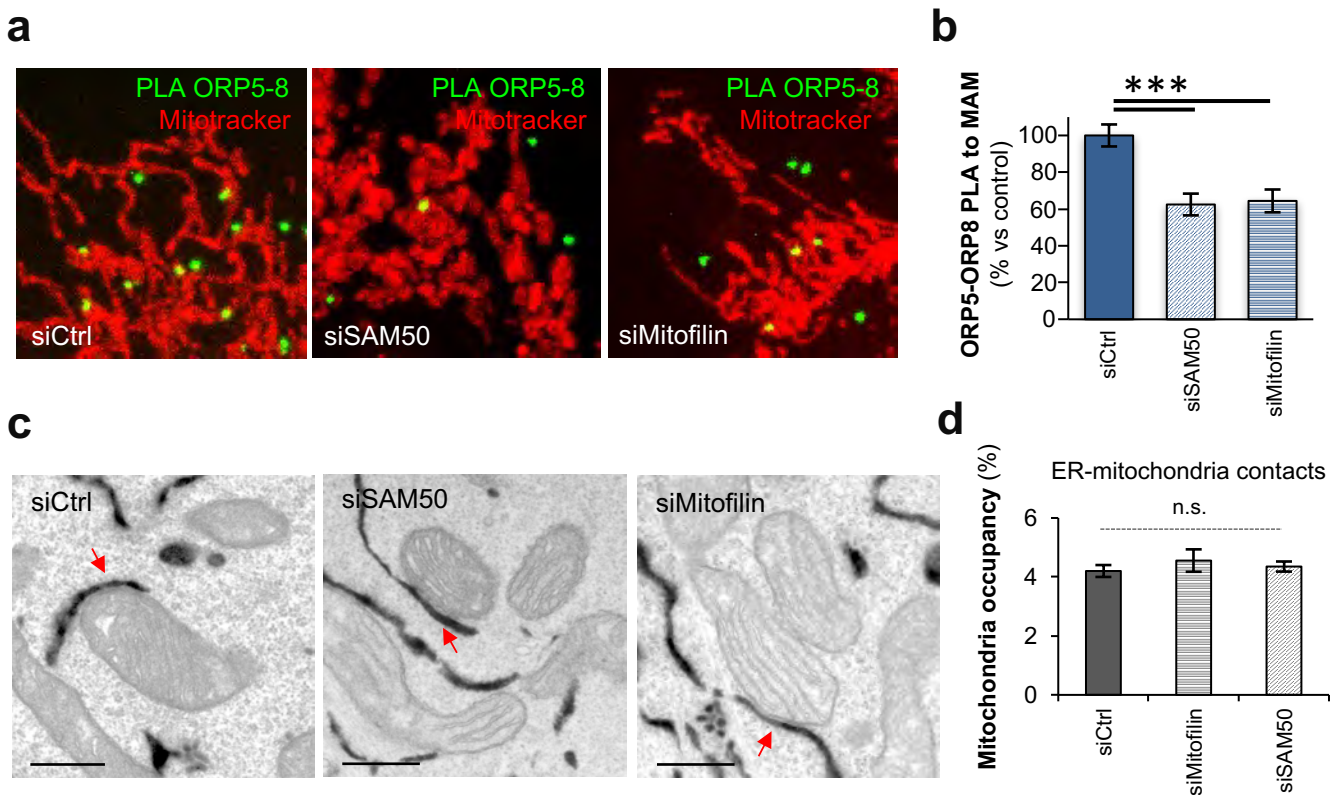

**Figure 5. SAM50 and Mitofilin knockdowns induce a decrease in ORP5-8 interaction at MAMs but do not alter the abundance of ER-mitochondria contact sites.** (a) Confocal images of a region of Ctrl (siCtrl), SAM50 (siSAM50) and Mitofilin (siMitofilin) knockdown HeLa cells showing endogenous interaction of ORP5-8 by Duolink PLA (green) near mitochondria (MitoTracker, red). (b) Quantification of ORP5-8 PLA signals in Control, SAM50 and Mitofilin knockdown HeLa cells, showing the decrease of about 40% of ORP5-ORP8 PLA in SAM50 and Mitofilin knockdown cells as compared to control. Bars indicate mean values  $\pm$  SEM. Number of cell analysed: siCtrl (n=33), siSAM50 (n=19), siMitofilin (n=24). Statistical analysis: unpaired student's *t*-test. \*\*\* $P < 0.001$ . (c) Representative electron micrographs of HeLa cells treated with Ctrl siRNAs or siRNAs against SAM50 or Mitofilin and transfected with HRP-KDEL. Red arrows indicate ER-mitochondria contact sites. Scale bar, 500 nm. (d) Quantifications of the extent of ER-mitochondria contact sites in Ctrl, Mitofilin and SAM50 knockdown cells expressing HRP-KDEL. Data are shown as % of the ER in contact with mitochondria (mitochondria occupancy)  $\pm$  SEM, n = 30 for siCtrl, n = 20 cell profiles for siMitofilin and siSAM50 and 1000 mitochondria; n.s.; not significant.

## Figure 5

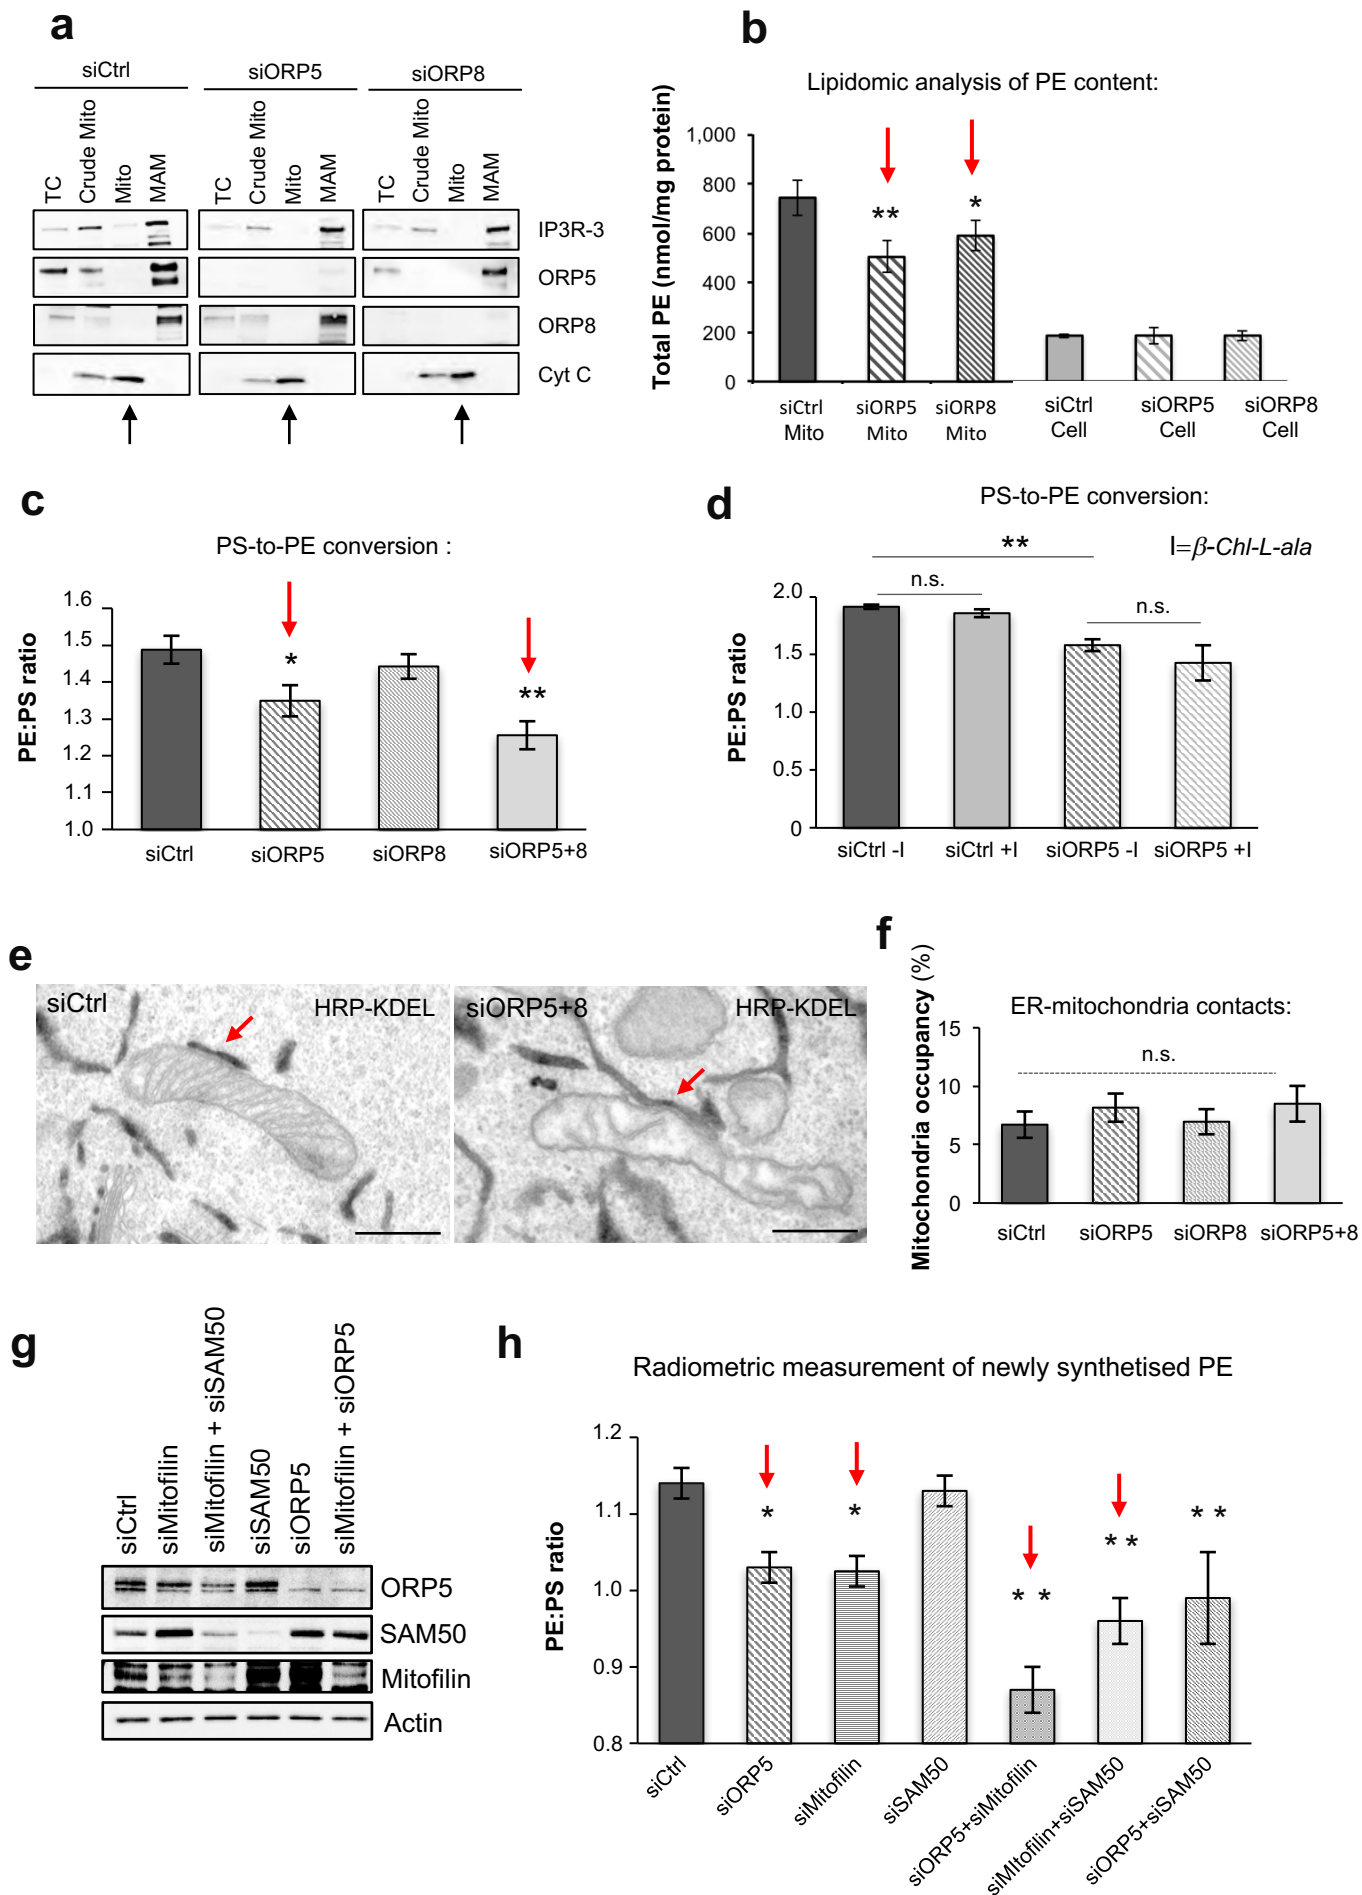

**Figure 6. ORP5/8 and the MIB/MICOS complex regulate levels of PS-derived**

**mitochondrial PE** (a) Crude mitochondria, mitochondria, and MAM fractions were purified from Ctrl, ORP5 and ORP8 siRNA-treated HeLa cells. Equal amounts of protein from each fraction were loaded on a 4–20% gradient SDS–PAGE gel and immunoblotted using anti-ORP5, anti-ORP8, anti-IP3R-3 (MAM protein), and anti-cytochrome c (mitochondrial protein). Mito, mitochondria; MAM, mitochondria-associated ER membrane. (b) Mass spectrometry (MS)-based quantification of the PE content (nmol/mg protein) of mitochondria isolated from Ctrl, ORP5 or ORP8 knockdown cells and of Ctrl, ORP5 or ORP8 knockdown intact cells. Data are shown as mean of three independent replicates  $\pm$ SEM. Statistical analysis: unpaired student's *t*-test, \**P*<0.05, \*\**P*<0.01. (c) HeLa cells transfected with siCtrl, siORP5, siORP8 or siORP5+ORP8 RNAi oligos were incubated with L-[<sup>3</sup>H(G)]serine (30.9 Ci/mmol) for 18 hours. After extraction and separation of lipids by TLC, PS and PE spots were scraped and analyzed for [<sup>3</sup>H] radioactivity, as described under "Methods". Each condition was analyzed in triplicate in each of three independent biological replicates. Data are presented as mean of PE:PS ratio  $\pm$ SEM. Statistical analysis: unpaired student's *t*-test, \**P*<0.05, \*\**P*<0.01 compared to Ctrl. (d) Cells transfected with siCtrl and siORP5 oligos were treated with b-Chloro-L-alanine (b-Chl-L-ala, inhibitor of Ser-palmitoyltransferase) or untreated, then pulsed with 15  $\mu$ Ci/ml of [<sup>3</sup>H(G)]serine for 1 hour and chased for 12 hours in serum-free DMEM, before analysis. n.s. not significant, \*\**P*<0.01 compared to Ctrl. (e) Electron micrographs of HRP-KDEL-expressing HeLa cells treated with Ctrl siRNAs (siCtrl) or siRNAs against ORP5 and ORP8 (siORP5+siORP8). Red arrows indicate ER-mitochondria contact sites. Scale bar, 500 nm. (f) Quantifications of the extent of ER-mitochondria contact sites in siCtrl, siORP5, siORP8 and siORP5+8 cells expressing HRP-KDEL. Data are shown as % of the ER in contact with mitochondria (mitochondria occupancy)  $\pm$ SEM, *n* = 20 cell profiles and  $\pm$ 900 mitochondria; n.s.; not significant. (g) Western analysis showing ORP5, SAM50, Mitofilin and Actin levels in protein lysates from HeLa cells treated with siRNA against Ctrl, ORP5, Mitofilin or SAM50. Arrow indicates the specific band for Mitofilin.

(h) Radiometric measurement of PS-to-PE conversion in the indicated siRNAs. Data are presented as mean of PE:PS ratio  $\pm$  SEM. Each condition was performed in triplicate in each of the independent biological replicates (n = 5 for siCtrl and siORP5; n = 4 for siSAM50; n = 3 for the other siRNAs conditions). Statistical analysis: unpaired student's *t*-test , \*P<0.05, \*\*P<0.01 compared to Ctrl.

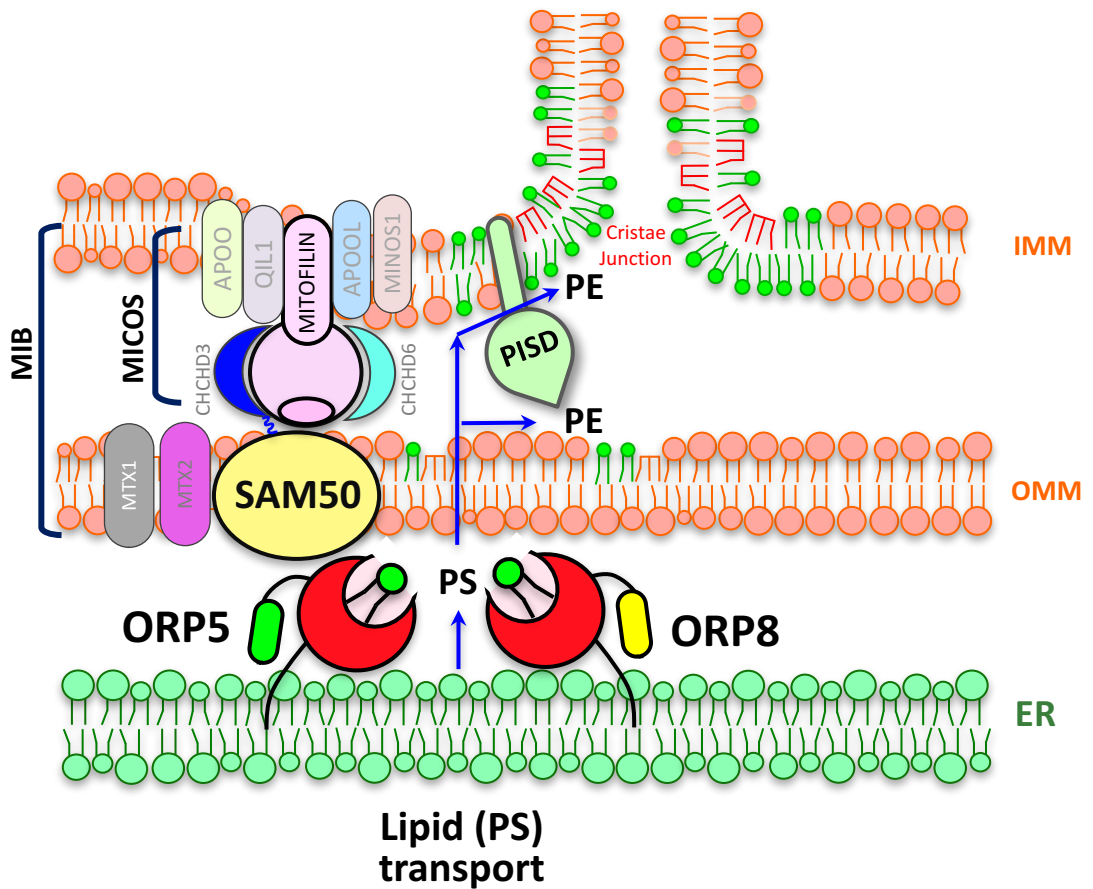

**Figure 7. PS transport at ER-mitochondria contact site subdomains associated to MIB/MICOS complex.** ORP5/8 mediate the transfer of PS from ER to mitochondria at ER-mitochondria membrane contact sites. This transfer occurs at ER subdomains facing the cristae junctions (CJ) where ORP5/8 interacts with SAM50 and Mitofilin, key proteins of the MIB complex. This interaction facilitates the transfer of PS from ER to the mitochondrial membranes at the level of CJ and PS conversion into PE, a phospholipid that plays a critical role in cristae organization and mitochondrial function.

**Figure 7**



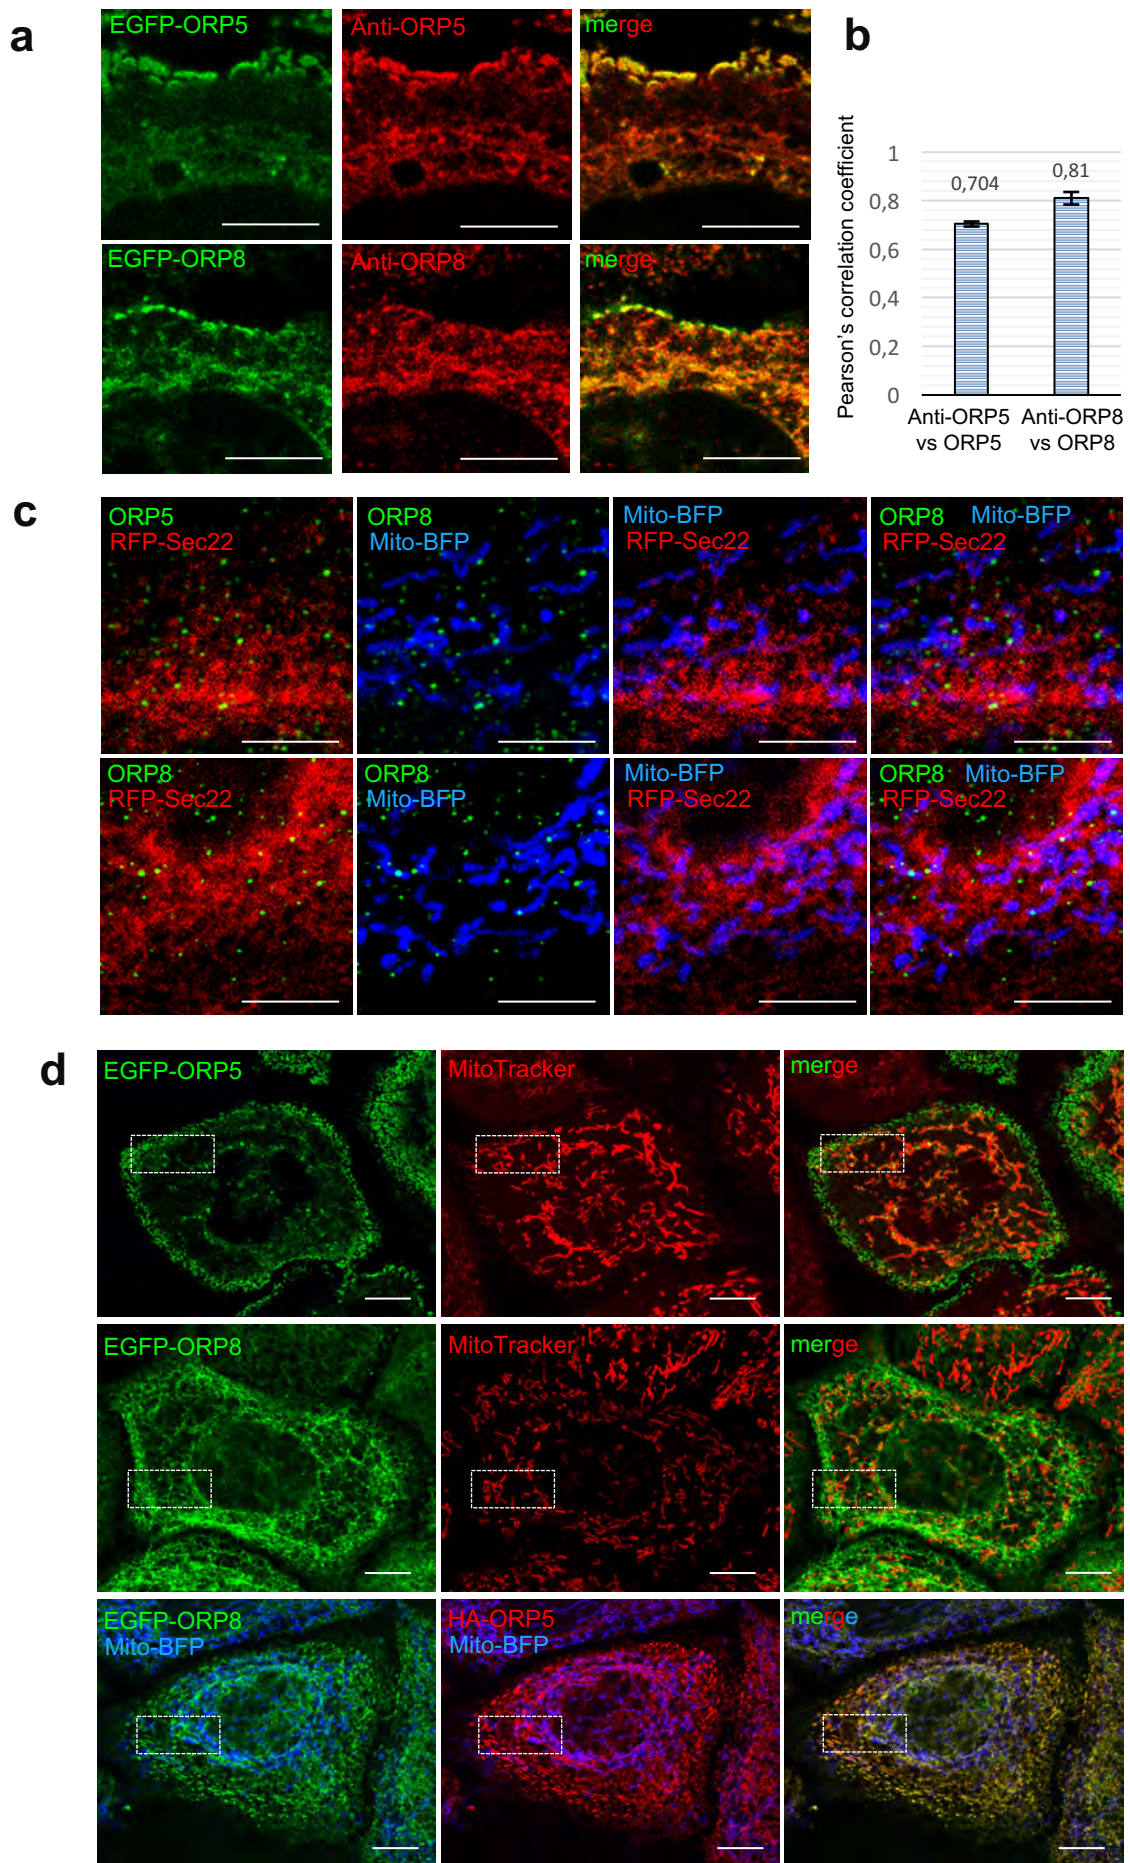

**Figure S1**

**Figure S1. Endogenous and co-overexpressed ORP5 and ORP8 co-localize at ER-mitochondria contact sites.** (a) Confocal images of a region of HeLa cell transfected with EGFP-ORP5 (green) or EGFP-ORP8 (green) and immunostained using anti-ORP5 (red) or anti-ORP8 (red) antibodies. Scale bar, 5  $\mu$ m. (b) Quantifications of the colocalization (Pearson's factor) of EGFP-ORP5 or EGFP-ORP8 with anti-ORP5 or anti-ORP8. Bars indicate mean values  $\pm$ SEM. Cells analyzed for sample: n=5. (c) Confocal micrographs of regions of HeLa cell transfected with RFP-Sec22b (red) together with Mito-BFP (blue) and immunostained for anti-ORP5 (green) or anti-ORP8 (green) antibodies. Scale bar, 5  $\mu$ m. (d) Confocal micrograph of a HeLa cell transfected with EGFP-ORP5 (green), EGFP-ORP8 (green) or EGFP-ORP8 (green) + HA-ORP5 (anti-HA, red), together with Mito-BFP (blue). The boxed areas are magnified in Fig 1g. Scale bar, 10  $\mu$ m.



**a**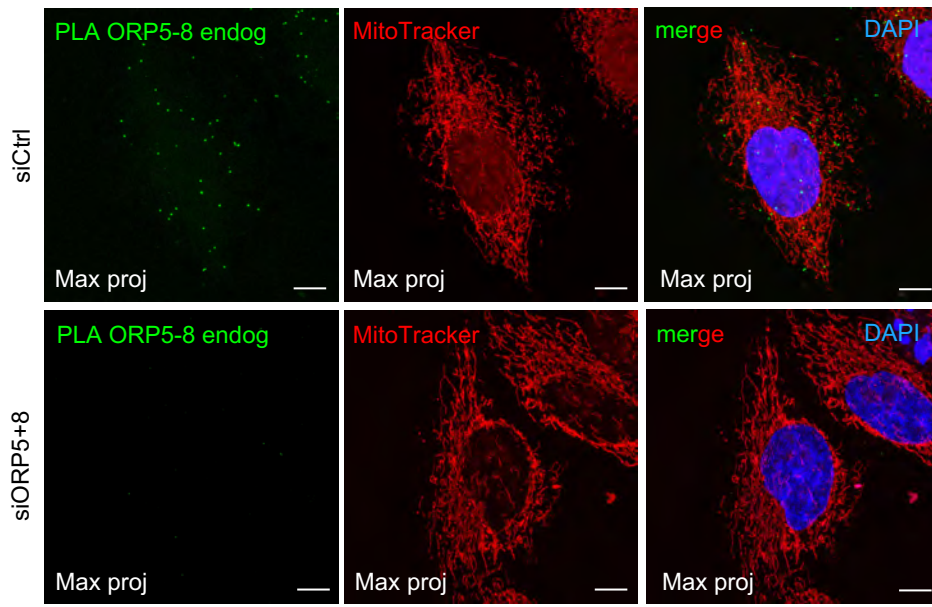**b**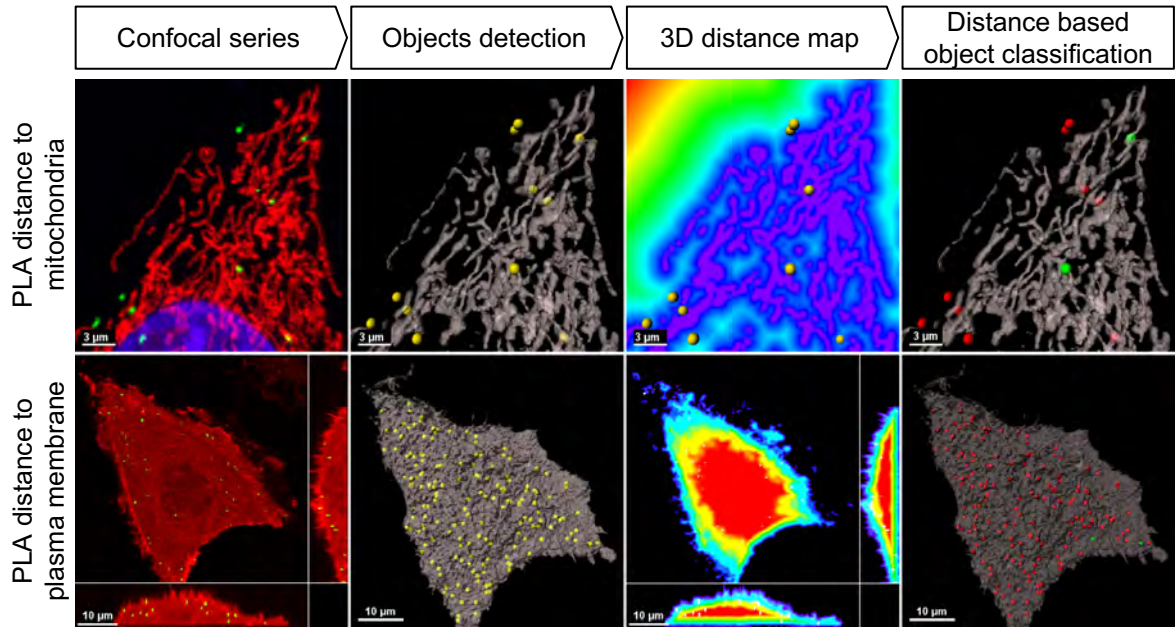**c**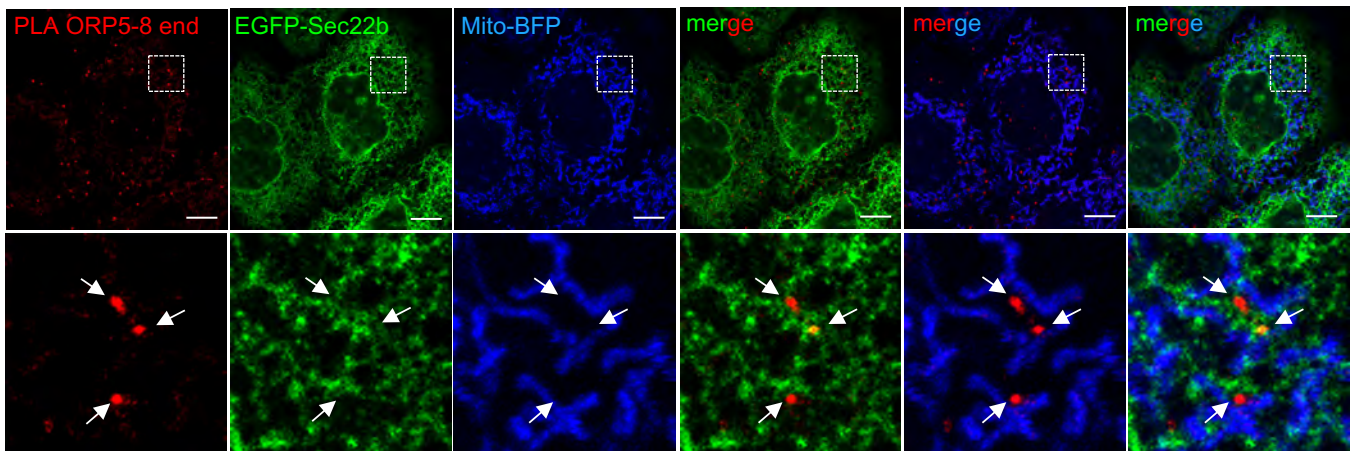**Figure S2**

**Figure S2. Endogenous ORP5-ORP8 interaction at ER-mitochondria contact sites.** (a) Confocal images showing endogenous interaction of ORP5-8 by Duolink PLA (green) in Ctrl (siCtrl), and ORP5+ORP8 (siORP5+8) knockdown HeLa cells labeled with MitoTracker (red) to stain mitochondria. Images are presented as maximum projection of all layers. Insets show magnifications of the boxed regions. Scale bar, 10  $\mu\text{m}$ . (b) Workflow for the identification of PLA signals in close proximity to the mitochondria or plasma membrane. First the confocal stacks are segmented to identify the PLA foci (spots), the mitochondria network (surfaces), and the plasma membrane (cells). Then 3D distance maps are computed towards the outside of the surfaces (mitochondria) or inside the cells allowing the measurement of the distance of each spot from the closest mitochondria or membrane. Finally PLA spots are classified into two population (red and green) based on a proximity threshold of 380nm established on the precision of the detection system. (c) Confocal micrographs of HeLa cell transfected with GFP-Sec22b (green) and Mito-BFP (blue) and showing endogenous interaction of ORP5-8 by Duolink PLA (red). Images are presented as superposition of two layers. Scale bar, 5  $\mu\text{m}$ .

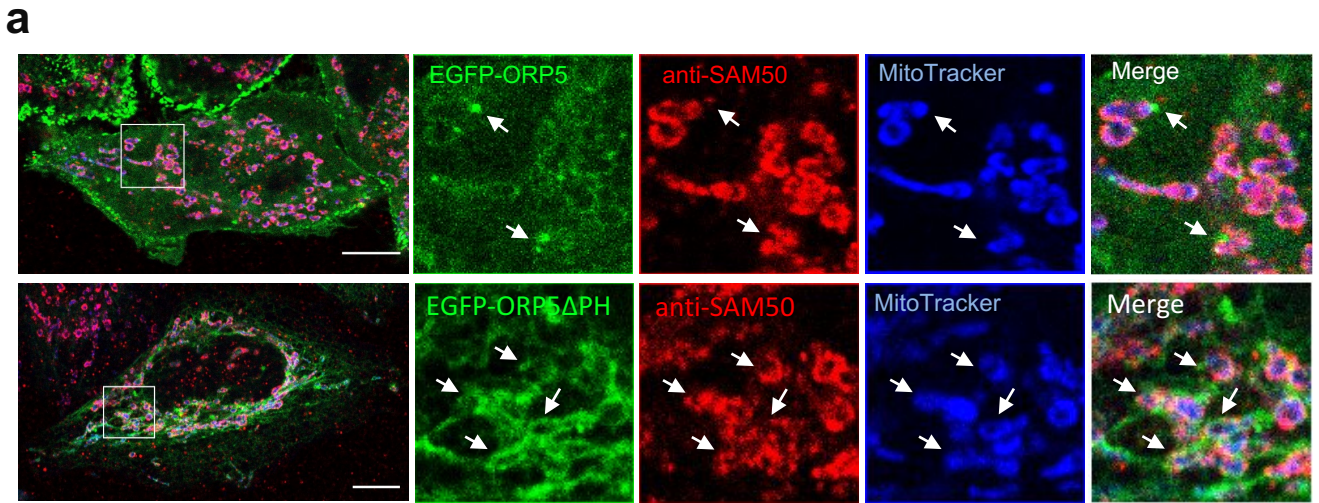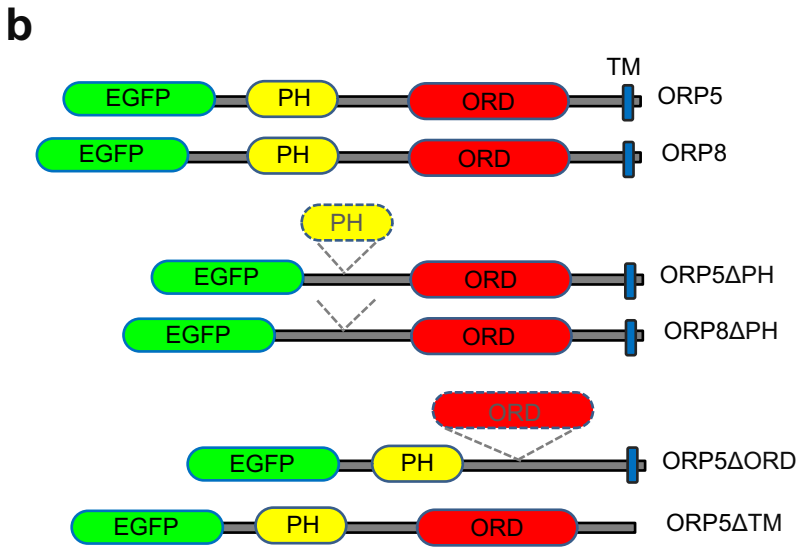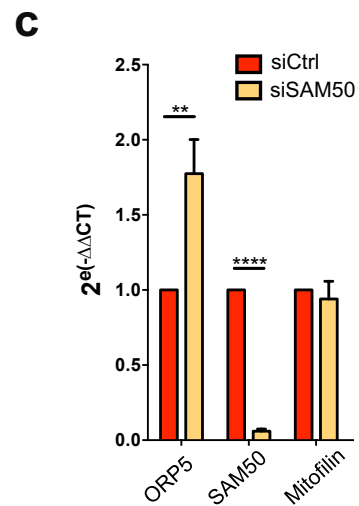

**Figure S3. Localization of ORP5 near SAM50-labeled mitochondria and effect of SAM50 KD on ORP5 and Mitofilin transcription.** (a) Confocal micrograph of a HeLa cells transfected with EGFP-ORP5 or EGFP-ORP5ΔPH (green) and Mito-BFP (blue) and stained with anti-SAM50 (red) antibody. Insets show magnifications of the boxed regions. Scale bar, 10 μm. (b) ORP5 and ORP8 full-length and mutant constructs used in Fig 4a-d and in in Fig. EV3a. (c) Quantitative RT-PCR analysis of ORP5, SAM50 and Mitofilin in SAM50 knockdown cells versus control HeLa cells. y axis:  $2^{(-\Delta\Delta Ct)}$  value represents differences between the mean Ct (Cycle threshold) values of tested genes and those of reference gene (SDHA). SAM50 knockdown does not alter Mitofilin RNA levels and it induces an increase in ORP5 transcription. Statistical analysis: unpaired student's *t*-test, \*\* $P < 0.01$ , \*\*\*\* $P < 0.0001$ .

## Figure S3



**a**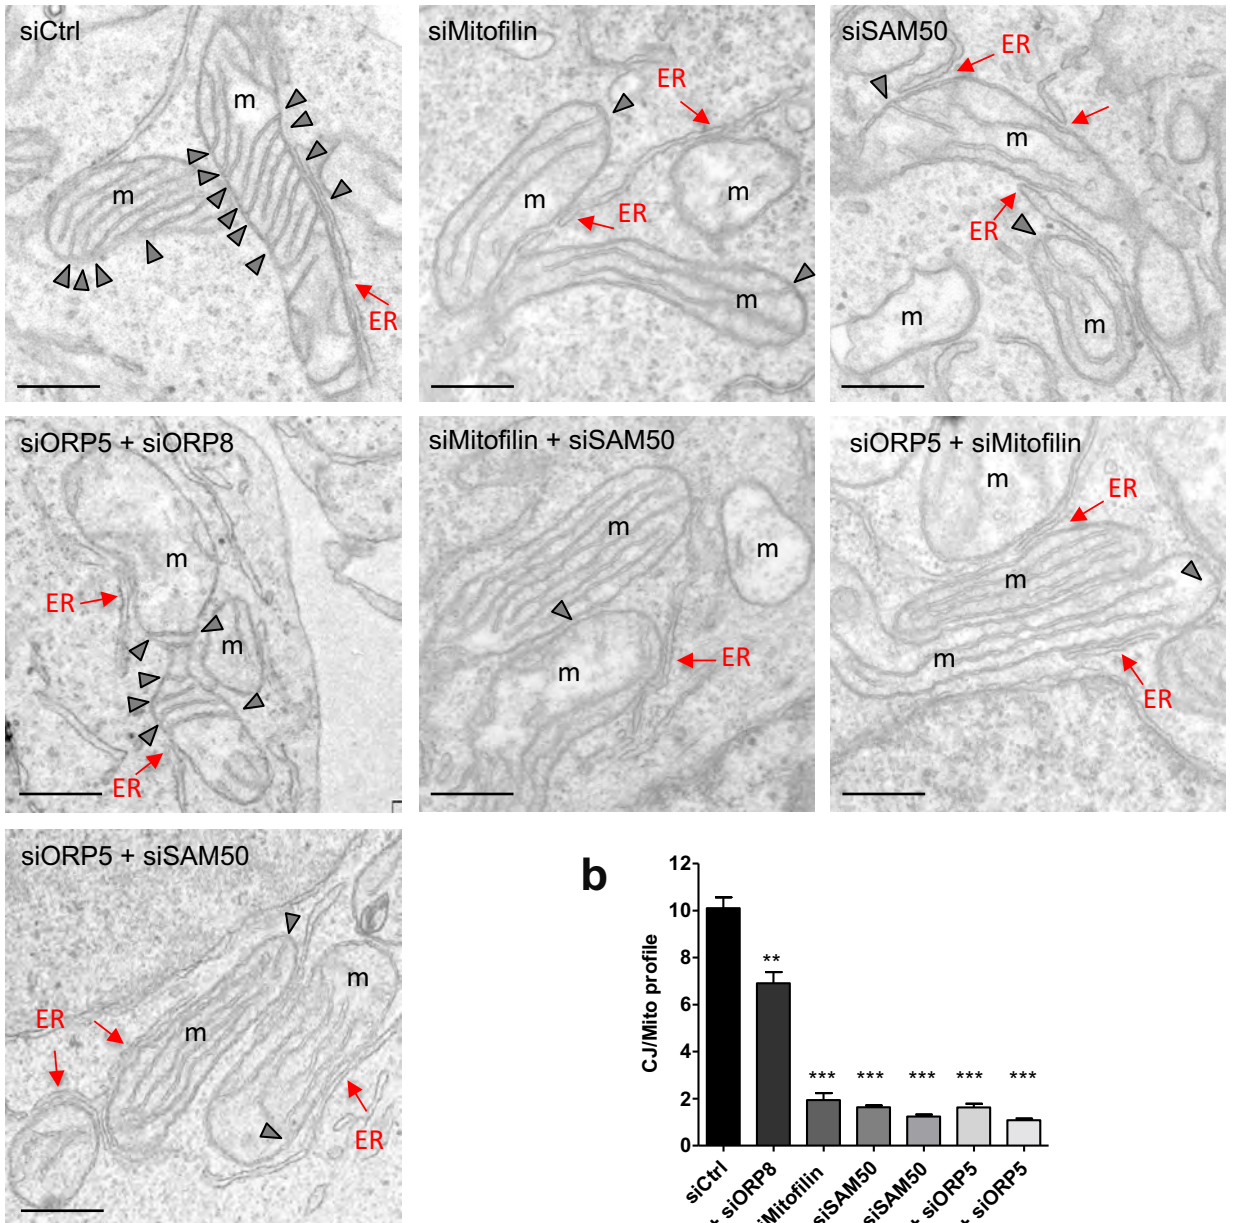**b**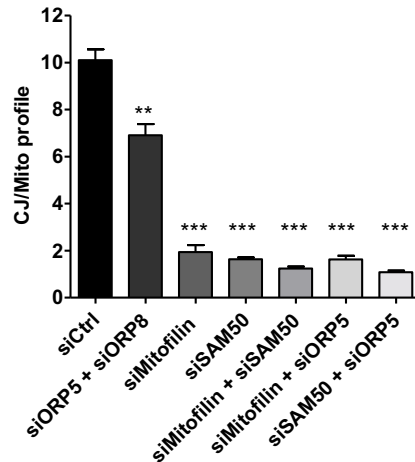

**Figure S4. Cristae Junctions are altered upon SAM50, Mitofilin and ORP5+8 knockdowns.** (a) Representative EM micrographs showing the morphology of mitochondria in HeLa cells treated with siRNA against ORP5, ORP8, Mitofilin and SAM50. Scale bar, 200 nm. Red arrows indicate ER elements in contact with mitochondria; arrowheads indicate CJ; m, mitochondria. (b) Quantifications of the number of CJ per mitochondria profile in the indicated siRNA conditions. % of CJ  $\pm$  SEM, n = 170-260 mitochondria. Statistical analysis: unpaired student's *t*-test, \*\**P*<0.01, \*\*\**P*<0.001.

## Figure S4

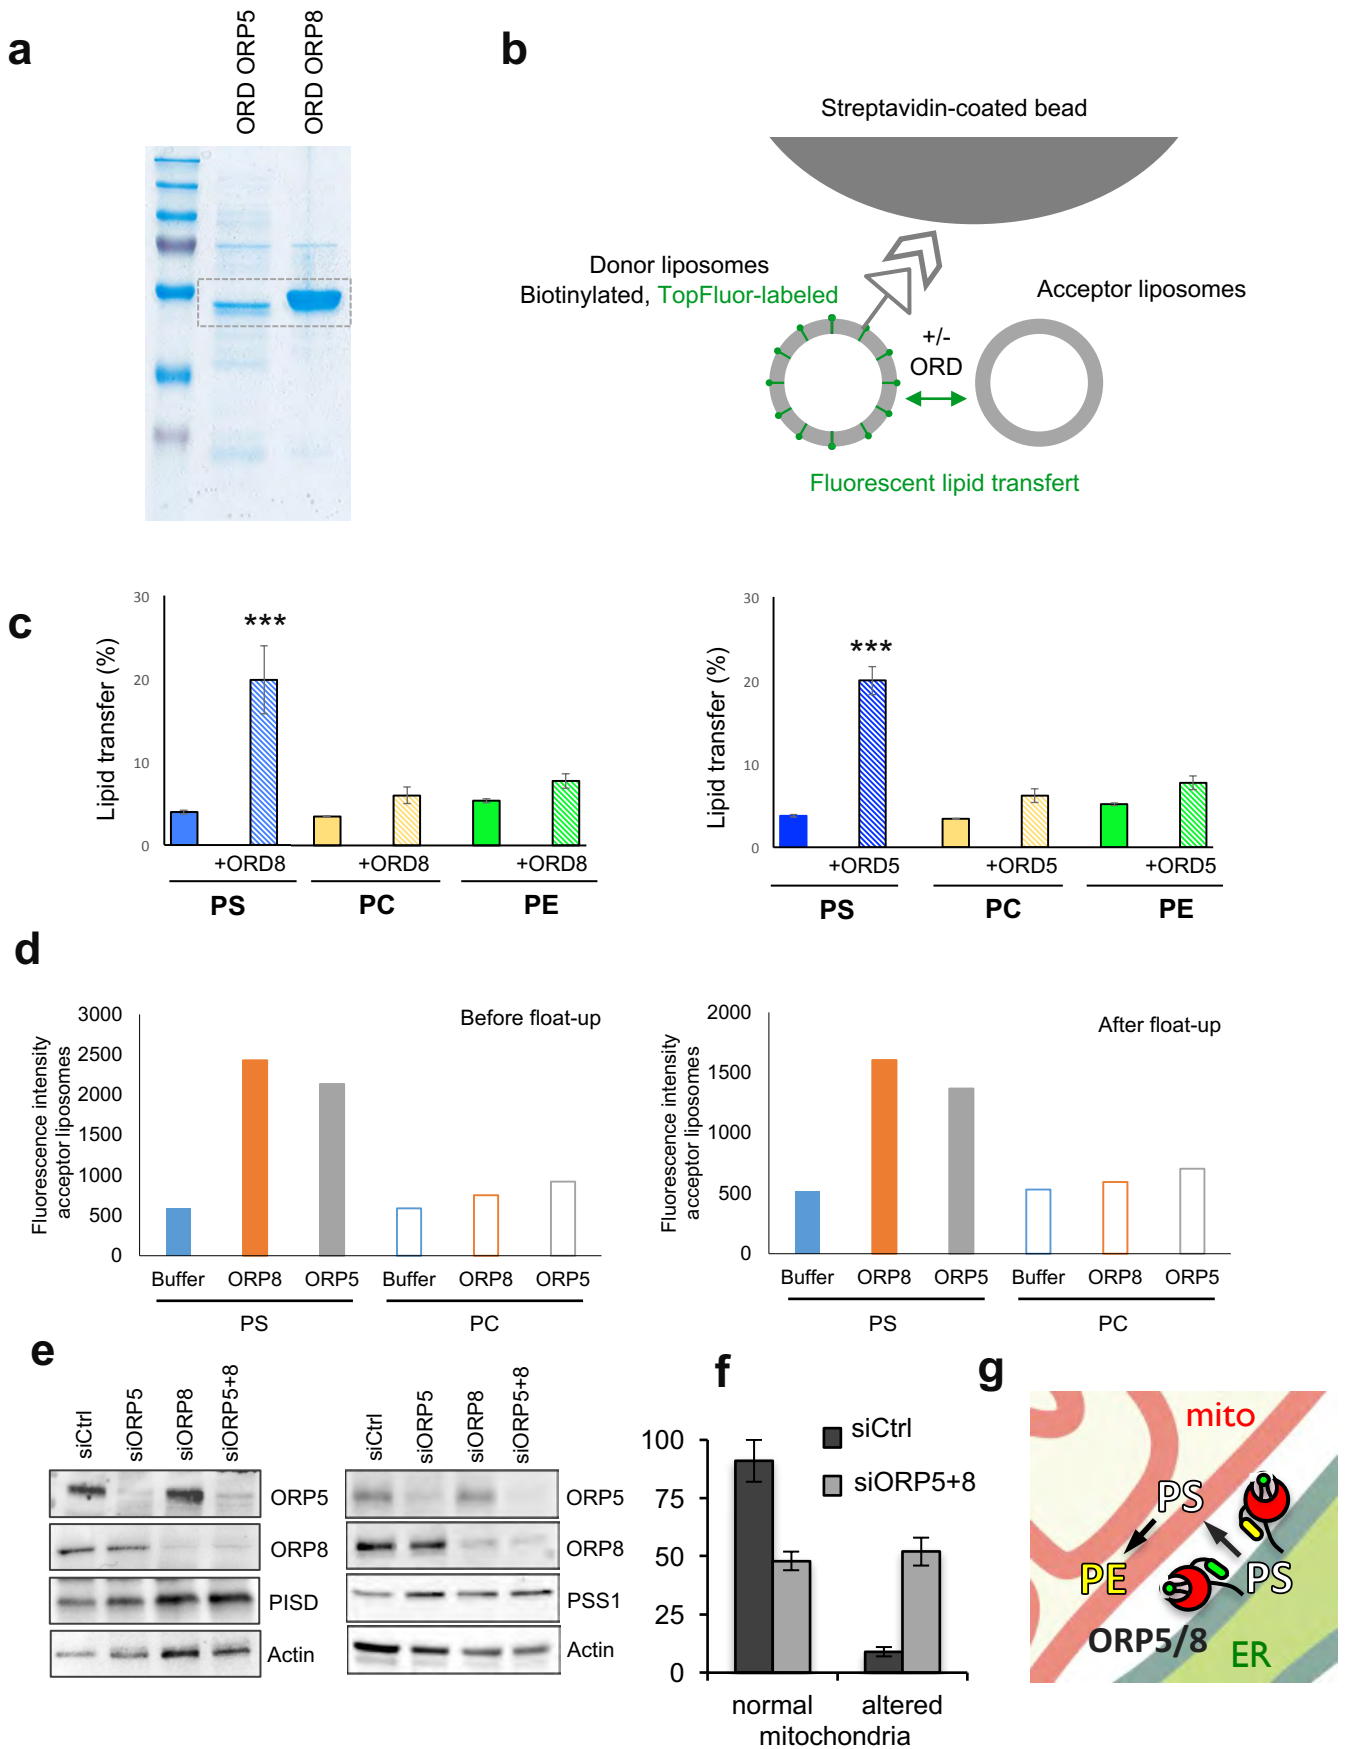

**Figure S5**

**Figure S5. ORP5 and ORP8 ORD domains mediate PS transfer between liposomes *in vitro* and ORP5/8 knockdown alter mitochondria morphology but not PSD1, PSS1 protein levels *in situ*.** (a) Coomassie stained SDS-PAGE of the recombinant ORD domain of ORP5/8 proteins purified from BL21DE3 RILP cells. (b) Schematic cartoon of the *in vitro* assay used to study ORP5/8 ORD-mediated lipid transport between liposomes. (c) Donor liposomes containing fluorescent lipids (97 mol% POPC, 1 mol% TopFluor-PS, -PC or -PE and 2 mol% of biotinylated-PE) and pre-bound to streptavidin beads were mixed at a 1:1 molar ratio with acceptor liposomes (100 mol% POPC) in the presence or absence of ORP5 or ORP8 ORD domains (250  $\mu$ M of donor and acceptor liposomes and 0,3  $\mu$ M of proteins in the reaction solution). The increase in fluorescence in the acceptor liposomes, which remain unbound in the solution, was measured after 1 hour of incubation at 37° C. Data are presented as % of transferred lipid  $\pm$ SEM and are the mean of six independent experiments. Statistical analysis: unpaired student's *t*-test , \*\*\*P<0.001. (d) Results of a lipid transfer experiment performed as in Fig. EV5c and presented as the fluorescence intensity of acceptor liposomes before (left panel) or after (right panel) their floatation on a Nycodenz gradient to confirm that fluorescence comes from the liposomes membrane. (e) WB analysis showing ORP5, ORP8, PSD1, PSS1 and Actin levels in protein lysates from HeLa cells treated with either Ctrl siRNAs or with siRNAs against ORP5 or/and ORP8. (f) Quantifications of the number of mitochondria with aberrant cristae morphology in the indicated siRNA conditions. Data are shown as % of mitochondria  $\pm$ SEM, n = 20 cell profiles and  $\pm$ 700 mitochondria. Statistical analysis: unpaired student's *t*-test, \*\*P<0.01 compared to siCtrl. (g) Schematic representation of non-vesicular PS transfer mediated by ORP5/8 at ER-mitochondria contact sites. PS is transported to mitochondrial membranes where it is rapidly converted into mitochondrial PE.

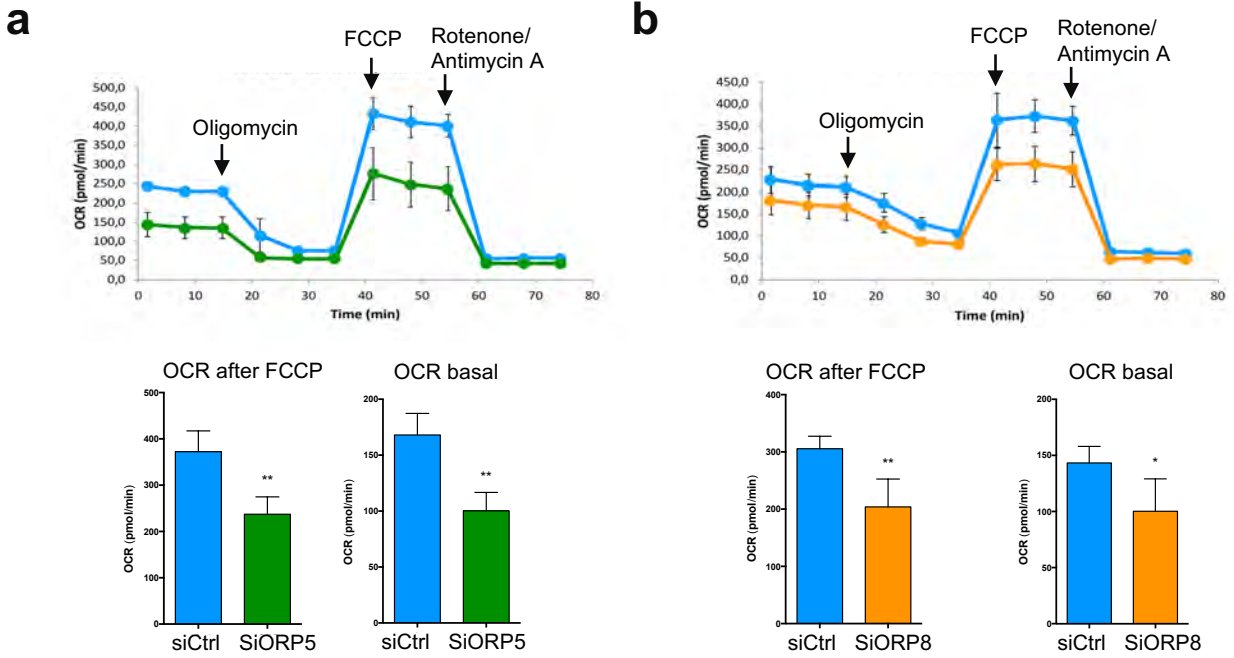

**Figure S6. ORP5 and ORP8 knockdowns affect mitochondria respiratory function.** (a-b) Mitochondrial oxygen consumption rate (OCR) measured in Ctrl and ORP5 (a) or ORP8 (b), siRNA-treated HeLa cells. OCR trace was obtained by sequential measurement of basal OCR ( $OCR_{BAS}$ ), OCR after the addition of Oligomycin, OCR after the addition of FCCP ( $OCR_{FCCP}$ ) and OCR after the addition of Rotenone/Antimycin A. Note the reduced OCR in siORP5 and siORP8 cells compared to Ctrl siRNA cells. Error bars denote  $\pm$ SEM. Data shown in the bar charts are the mean of 4 independent repeats ( $n=4$ ). Statistical analysis: unpaired student's *t*-test, \* $P<0.05$ , \*\* $P<0.01$  compared to Ctrl.
